# Supplementary material for: Development of asymmetrical near infrared squaraines with large Stokes shift
Source: Royal Society of Chemistry journal article supplement (doi:10.1039/c5ra18998e), 2015-01-01
Supplement: c5ra18998e1.pdf [file c5ra18998e1.pdf]

## Supporting Information

# Development of asymmetrical near infrared squaraines with large Stokes shift

*Xiaoqian Liu<sup>1</sup>, Bokun Cho<sup>3</sup>, Liyan Chan<sup>1</sup>, Wei Lei Kwan<sup>2\*</sup>, Chi-Lik Ken Lee<sup>1\*</sup>*

<sup>1</sup>Centre for Biomedical and Life Sciences, Department of Technology, Innovation and Enterprise (TIE), Singapore Polytechnic, Singapore. <sup>2</sup>Engineering Product Development, Singapore University of Technology and Design, Singapore. <sup>3</sup>Energetics Research Institute (EnRI), Nanyang Technological University, Singapore.

Corresponding authors: Wei Lek Kwan ([kwanwl@sutd.edu.sg](mailto:kwanwl@sutd.edu.sg)) and Chi-Lik Ken Lee ([kenlee@sp.edu.sg](mailto:kenlee@sp.edu.sg)).

## Table of Contents

|                                                                                          |     |
|------------------------------------------------------------------------------------------|-----|
| 1. General Information .....                                                             | S3  |
| 2. Materials Synthesis Scheme and Characterization.....                                  | S5  |
| 3. UV/vis/NIR absorption spectrum.....                                                   | S10 |
| 4. Cyclic voltammetry.....                                                               | S11 |
| 5. Emission Spectrum.....                                                                | S13 |
| 6. References.....                                                                       | S14 |
| 7. TDDFT Benchmark Studies.....                                                          | S15 |
| 8. <b>3a</b> , <b>6a-c</b> HOMO and LUMO of $S_0$ and $S_1$ .....                        | S17 |
| 9. <b>3a</b> , <b>6a-c</b> Reduced Density Gradient isosurface plot.....                 | S21 |
| 10. <b>3a</b> , <b>6a-c</b> $S_0$ and $S_1$ dihedral angle deviation from planarity..... | S25 |
| 11. <b>3a</b> , <b>6a-c</b> $S_0$ and $S_1$ Cartesian coordinates.....                   | S27 |

## **1. General Information**

### **Materials Used**

All chemicals, otherwise stated, were purchased from Sigma Aldrich and used without further purifications.

### **Liquid Chromatography-Mass Spectrum (LC/MS)**

Shimadzu 2020 Liquid chromatography – Mass Spectroscopy (LC/MS) was used for analyzing reaction mixture. Sonoma C18 Column, 4.6mm x 50mm, 5 $\mu$  100 $\text{\AA}$  particle size columns was used. Analytical method is gradient 5% - 95% ACN over 6 minutes at a flow rate of 1mL/min.

The mobile phases used for LC/MS are 0.05% FA in ACN and 0.05% FA in MilliQ-H<sub>2</sub>O.

HRMS was determined using microOTOF-Q II with APCI source in positive ion polarity.

### **Nuclear Magnetic Resonance Spectroscopy**

Proton nuclear magnetic resonance (<sup>1</sup>H NMR) and carbon nuclear magnetic resonance (<sup>13</sup>C NMR) spectroscopy were performed on 400 MHz and 300MHz NMR spectrometers. Chemical shifts are reported as  $\delta$  in units of parts per million (ppm) downfield from tetramethylsilane ( $\delta$ 0.00), using the residual solvent signal as an internal standard: chloroform-d, CDCl<sub>3</sub>, (<sup>1</sup>H NMR,  $\delta$  7.26, singlet; <sup>13</sup>C NMR,  $\delta$  77.04, triplet). Multiplicities are given as: s (singlet), d (doublet), t (triplet), q (quartet), m (multiplets). The number of protons (n) for a given resonance is indicated by nH.

### **Cyclic Voltammetry (CV) Measurement**

CV measurement was conducted in a three electrode cell consisting of reference electrode (Ag/AgCl), working electrode (Pt) and counter electrode. The working electrode was filled with electrolyte solution (non aqueous c(LiCl) 2mol/L in ethanol) from Fluka Analytical. 0.1M tetrabutylammonium hexafluorophosphate ( $(\text{CH}_3\text{CH}_2\text{CH}_2\text{CH}_2)_4\text{N}(\text{PF}_6)$ ) from Fluka Analytical in dichloromethane was prepared. The calibration graph for ( $\text{Fc}/\text{Fc}^+$ ) was measured by dissolving Ferrocene from Sigma Aldrich in the 0.1M  $(\text{CH}_3\text{CH}_2\text{CH}_2\text{CH}_2)_4\text{N}(\text{PF}_6)$  solution. The same procedure was repeated by dissolving various squaraine dyes to obtain the CV measurement for various squaraine dyes. The  $E_{\text{ox}}$  and  $E_{\text{red}}$  values were determined from the CV curve and  $\lambda_{\text{ons}}$  from the UV-Abs curve. The HOMO and LUMO energy level were then estimated from the following empirical formulae,  $E_{\text{HOMO}}^{\text{opt}} = -5.23\text{eV} - eE_{\text{ox}} + 1/2(E_{\text{cv}}^{\text{sol}} - E_{\text{g}})$ ,  $E_{\text{LUMO}}^{\text{opt}} = -5.23\text{eV} - eE_{\text{red}} - 1/2(E_{\text{cv}}^{\text{sol}} - E_{\text{g}})$ ,  $E_{\text{cv}}^{\text{sol}} = E_{\text{ox}} - E_{\text{red}}$ ,  $E_{\text{g}} = 1240/\lambda_{\text{ons}}$ .

### **Absorbance and Fluorescence Measurement**

UV-Abs characterization was measured in 3 different solvents by UV spectrophotometer (UV-1800) from Shimadzu. Fluorescence measurements were performed in DMSO by an Infinite® 200 PRO multimode reader (Tecan Group Ltd., Männedorf, Switzerland).

## 2. Materials Synthesis Scheme and Characterization

The synthesis of compound **1** <sup>[1]</sup> and **4** <sup>[2]</sup> are followed by reported literatures.

General procedures for synthesis of **3a-3c**

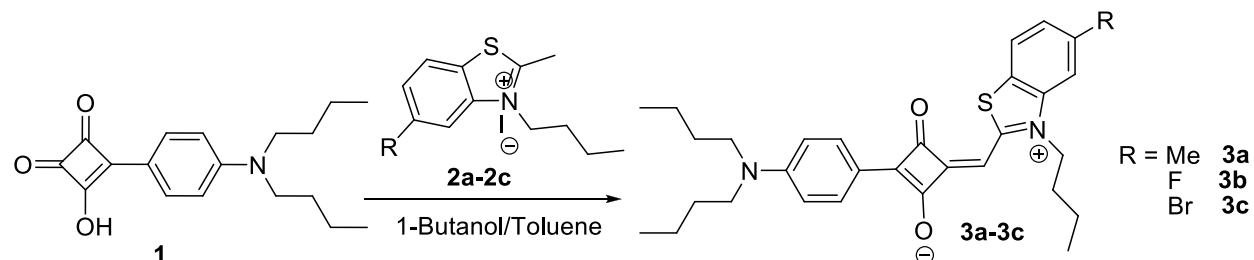

To a 50 mL round bottle flask was added 1 mmol of **1** and 1 mmol of **2a-2c** followed by 1:1 BuOH/toluene mixture (20 ml: 20 ml) and set to reflux overnight. Upon completion of reaction, the solvent was then removed under reduced pressure and purified by column chromatography (silica gel, hexane/ EtOAc 10:1) to achieve compound **3a-3c** in a moderate yield.

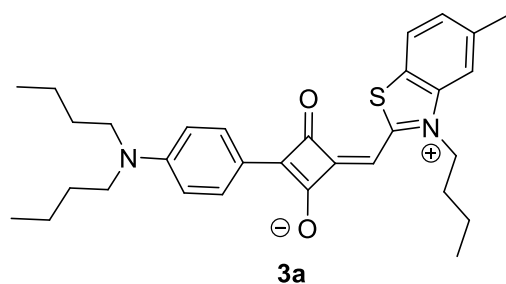

**3a**, 48% yield, blue paste.

<sup>1</sup>H NMR (400 MHz, CDCl<sub>3</sub>, ppm) δ 8.08-8.05 (d, 2H, *J* = 9.2 Hz), 7.57-7.55 (d, 1H, *J* = 8.0 Hz), 7.17-7.15 (d, 1H, *J* = 8.0 Hz), 7.11 (s, 1H), 6.64-6.62 (d, 2H, *J* = 2H), 6.26 (s, 1H), 4.27-4.24 (m, 2H), 3.35-3.31 (m, 4H), 2.44 (s, 1H), 1.83-1.80 (m, 2H), 1.60-1.46 (m, 6H), 1.38-1.31 (m, 4H), 1.01-1.00 (m, 9H).

<sup>13</sup>C NMR (100 MHz, CDCl<sub>3</sub>, ppm) δ 207.1, 185.2, 183.4, 181.8, 173.8, 168.2, 165.4, 150.1, 140.7, 138.8, 130.0, 127.3, 126.4, 122.4, 119.2, 113.3, 111.5, 89.2, 50.8, 47.2, 40.0, 30.0, 29.5, 21.8, 21.1, 20.3, 20.2, 14.0, 13.8.

HRMS-APCI MS(*m/z*) for C<sub>31</sub>H<sub>39</sub>N<sub>2</sub>O<sub>2</sub>S: 503.2720 (calculated); 503.2727 (measured)

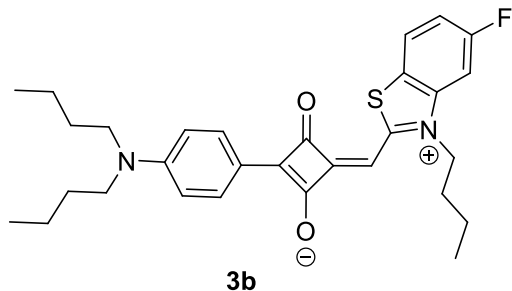

**3b**, 55% yield, blue paste.

$^1\text{H}$  NMR (400 MHz,  $\text{CDCl}_3$ , ppm)  $\delta$  8.13- 8.11 (d, 2H,  $J = 6.0$  Hz), 7.70-7.68 (m, 1H), 7.47-7.45 (m, 1H), 7.34-7.32 (m, 2H), 6.65-6.63 (d, 2H,  $J = 6.6$  Hz), 6.21 (s, 1H).

$^{13}\text{C}$  NMR (100 MHz,  $\text{CDCl}_3$ , ppm)  $\delta$  186.6, 183.1, 181.8, 170.1, 165.0, 150.3, 140.5, 130.2, 129.4, 127.9, 126.3, 125.8, 122.8, 122.5, 120.9, 119.3, 122.9, 111.5, 88.7, 50.8, 47.1, 30.0, 29.7, 29.6, 21.5, 20.3, 20.2, 20.1, 14.0, 13.7.

ESI-APCI MS( $m/z$ ) for  $\text{C}_{30}\text{H}_{35}\text{FN}_2\text{O}_2\text{S}$ : 506.68 (calculated); 507.45 (measured).

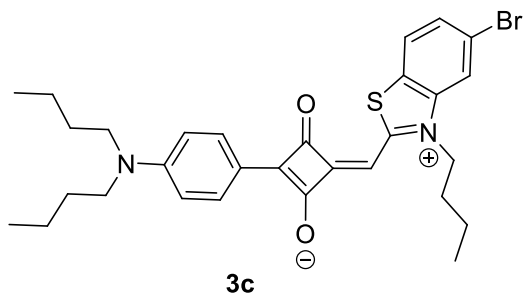

**3c**, 55% yield, blue paste.

$^1\text{H}$  NMR (400 MHz,  $\text{CDCl}_3$ , ppm)  $\delta$  8.26-8.24 (d, 2H,  $J = 8$  Hz), 7.50 (s, 1H), 7.47-7.44 (m, 1H), 6.98-6.96 (d, 1H,  $J = 8.1$  Hz), 6.68-6.66 (d, 2H,  $J = 8.0$  Hz), 6.13 (s, 1H), 4.09-4.06 (m, 2H), 3.40-3.36 (m, 4H), 1.81-1.75 (m, 8H), 1.65-1.57 (m, 4H), 1.47-1.25 (m, 6H), 1.00-0.97 (m, 9H).

$^{13}\text{C}$  NMR (100 MHz,  $\text{CDCl}_3$ , ppm)  $\delta$  188.1, 176.6, 173.4, 151.7, 144.7, 140.9, 131.5, 131.1, 131.0, 125.9, 125.5, 122.5, 119.0, 118.3, 111.9, 111.8, 111.7, 110.8, 89.1, 89.0, 50.9, 50.8, 50.5, 50.3, 44.2, 29.5, 29.4, 29.3, 29.2, 26.7, 26.5, 20.5, 13.9, 13.8.

ESI-APCI MS( $m/z$ ) for  $\text{C}_{30}\text{H}_{35}\text{BrN}_2\text{O}_2\text{S}$ : 567.59 (calculated); 566.84 (measured).

General procedures for synthesis of **6a-6c**

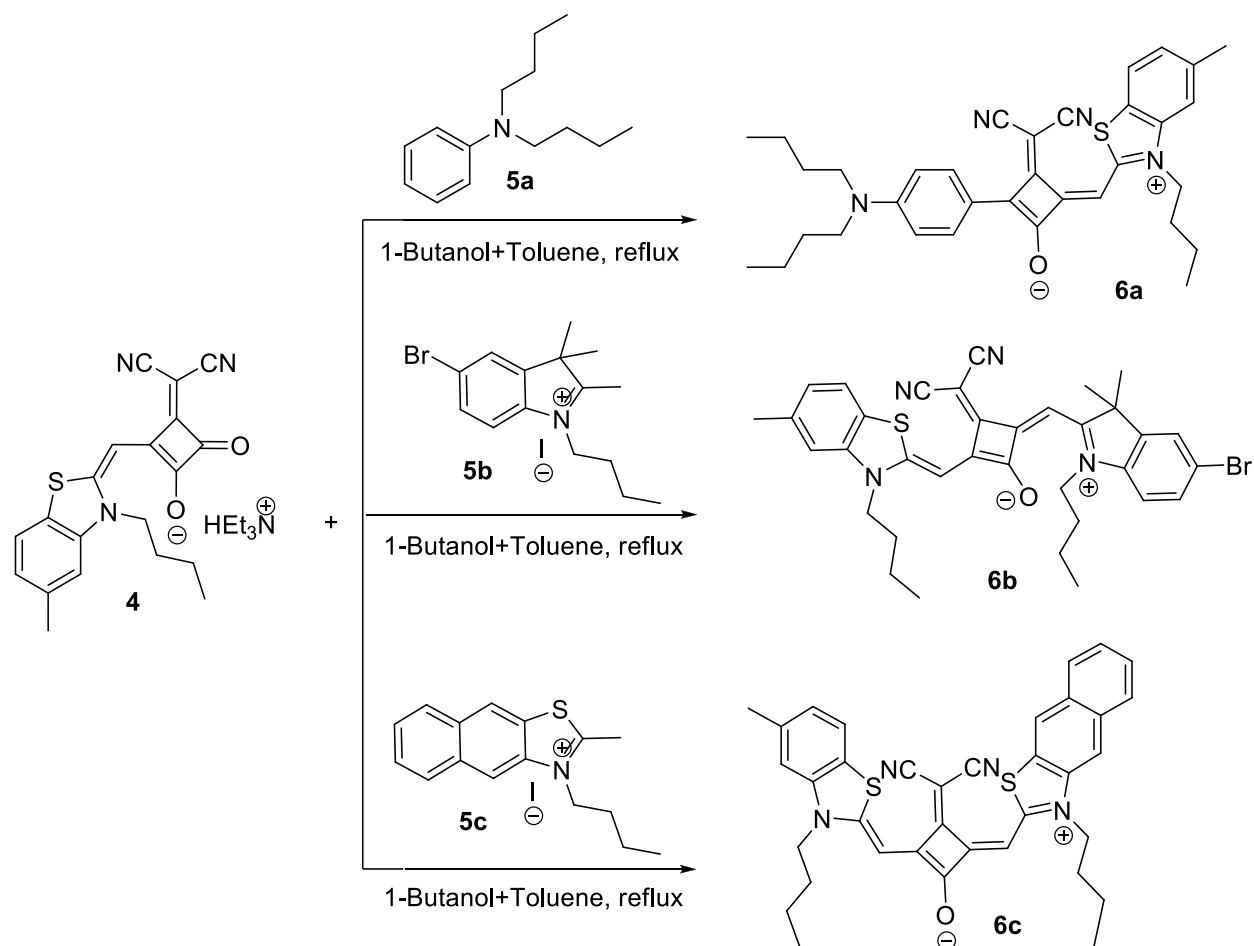

To a 50 mL round bottle flask was added 1 mmol of **1** and 1 mmol of **5a**, **5b** or **5c** followed by 1:1 BuOH/toluene mixture (20 ml: 20 ml) and set to reflux overnight. Upon completion of reaction, the solvent was then removed under reduced pressure and purified by column chromatography to achieve compound **6a**, **6b** or **6c** in a moderate yield.

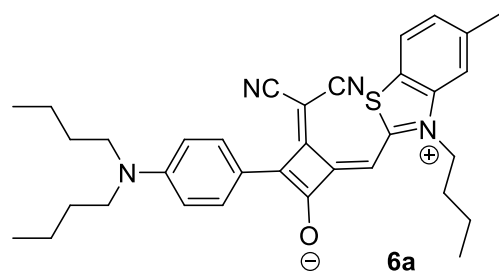

**6a**, 8 % yield, dark solid.

$^1\text{H}$  NMR ( $\text{CDCl}_3$ , 400 MHz, ppm)  $\delta$  8.30-8.28 (d, 2H,  $J = 9.2$  Hz), 7.72-7.70 (d, 1H,  $J = 8.2$  Hz), 7.58 (m, 1H), 7.35-7.34 (m, 1H), 7.02 (s, 1H), 6.74-6.72 (d, 2H,  $J = 9.3$  Hz), 4.40-4.48 (m, 2H), 3.41-3.37 (m, 4H), 2.59 (s, 3H), 1.26-1.25 (m, 6H), 1.18-1.14 (m, 6H), 1.09-1.08 (m, 9H).

$^{13}\text{C}$  NMR (100 MHz,  $\text{CDCl}_3$ , ppm)  $\delta$  176.7, 170.7, 165.9, 163.9, 160.5, 150.5, 140.6, 139.5, 132.1, 128.2, 126.5, 122.6, 119.6, 117.9, 113.8, 111.7, 91.5, 50.9, 48.1, 43.1, 32.0, 30.3, 29.7, 29.5, 29.4, 22.7, 21.9, 20.3, 20.2, 14.2, 14.0, 13.8.

HRMS-APCI MS ( $m/z$ ) for  $\text{C}_{34}\text{H}_{39}\text{N}_4\text{OS}$ : 551.2830 (calculated); 551.2839 (measured).

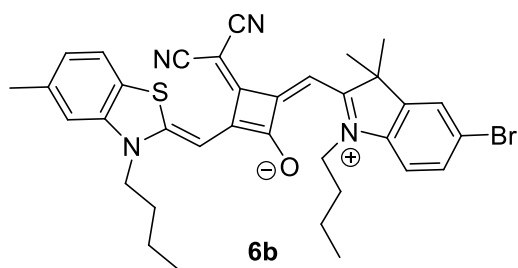

**6b**, 45% yield, dark solid.

$^1\text{H}$  NMR (400 MHz,  $\text{CDCl}_3$ , ppm)  $\delta$  7.59-7.57 (d, 1H,  $J = 8.0$  Hz), 7.45-7.42 (m, 2H), 7.24-7.22 (d, 1H,  $J = 8.0$  Hz), 7.18 (s, 1H), 6.86-6.84 (m, 1H), 6.65 (s, 1H), 6.30 (s, 1H), 4.29-4.25 (t, 2H,  $J = 7.6$  Hz), 3.90 (m, 2H), 2.56 (s, 1H), 1.90 (m, 2H), 1.79-1.77 (m, 8H), 1.56-1.48 (m, 4H), 1.08-1.02 (m, 6H).

$^{13}\text{C}$  NMR (100 MHz,  $\text{CDCl}_3$ , ppm)  $\delta$  173.8, 167.6, 166.7, 165.3, 163.3, 161.7, 143.8, 141.7, 140.8, 138.9, 130.7, 127.8, 127.2, 125.9, 125.5, 122.2, 119.0, 118.6, 115.9, 114.0, 113.2, 110.4, 88.8, 88.0, 48.5, 47.3, 43.8, 41.1, 29.9, 29.1, 27.1, 21.9, 20.2, 14.0, 13.8.

HRMS-APCI MS ( $m/z$ ) for  $\text{C}_{35}\text{H}_{36}\text{BrN}_4\text{OS}$ : 639.1796 (calculated); 639.1788 (measured).



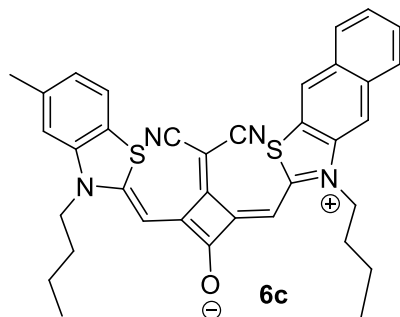

**6c**, 19 % yield, dark solid.

$^1\text{H}$  NMR (400 MHz,  $\text{CDCl}_3$ , ppm)  $\delta$  7.93-7.86 (m, 3H), 7.50-7.37 (m, 4H), 7.07-7.05 (d, 1H,  $J = 8.0$  Hz), 6.97 (s, 1H), 6.26 (s, 1H), 6.10 (s, 1H), 4.24-4.21 (m, 2H), 4.03-4.00 (m, 2H), 2.48 (s, 3H), 1.86-1.77 (m, 4H), 1.55-1.48 (m, 4H), 1.03-1.00 (m, 6H);

$^{13}\text{C}$  NMR (100 MHz,  $\text{CDCl}_3$ , ppm) 174.3, 163.1, 162.8, 162.3, 160.1, 141.2, 138.5, 137.9, 130.4, 128.9, 129.0, 128.1, 127.3, 126.2, 125.2, 124.8, 123.5, 121.8, 112.2, 111.4, 86.9, 86.5, 77.4, 77.3, 77.1, 76.7, 47.1, 46.5, 29.9, 29.7, 29.5, 21.8, 20.2, 20.2, 14.2, 13.9, 13.9.

HRMS-APCI MS ( $m/z$ ) for  $\text{C}_{36}\text{H}_{33}\text{N}_4\text{OS}_2$ : 601.2103 (calculated); 601.2090 (measured).

### 3. UV/vis/NIR absorption spectrum

10  $\mu\text{M}$  dye solutions in UV measurements were prepared by diluting 1000 times from 10 mM stock dye solution in DMSO.

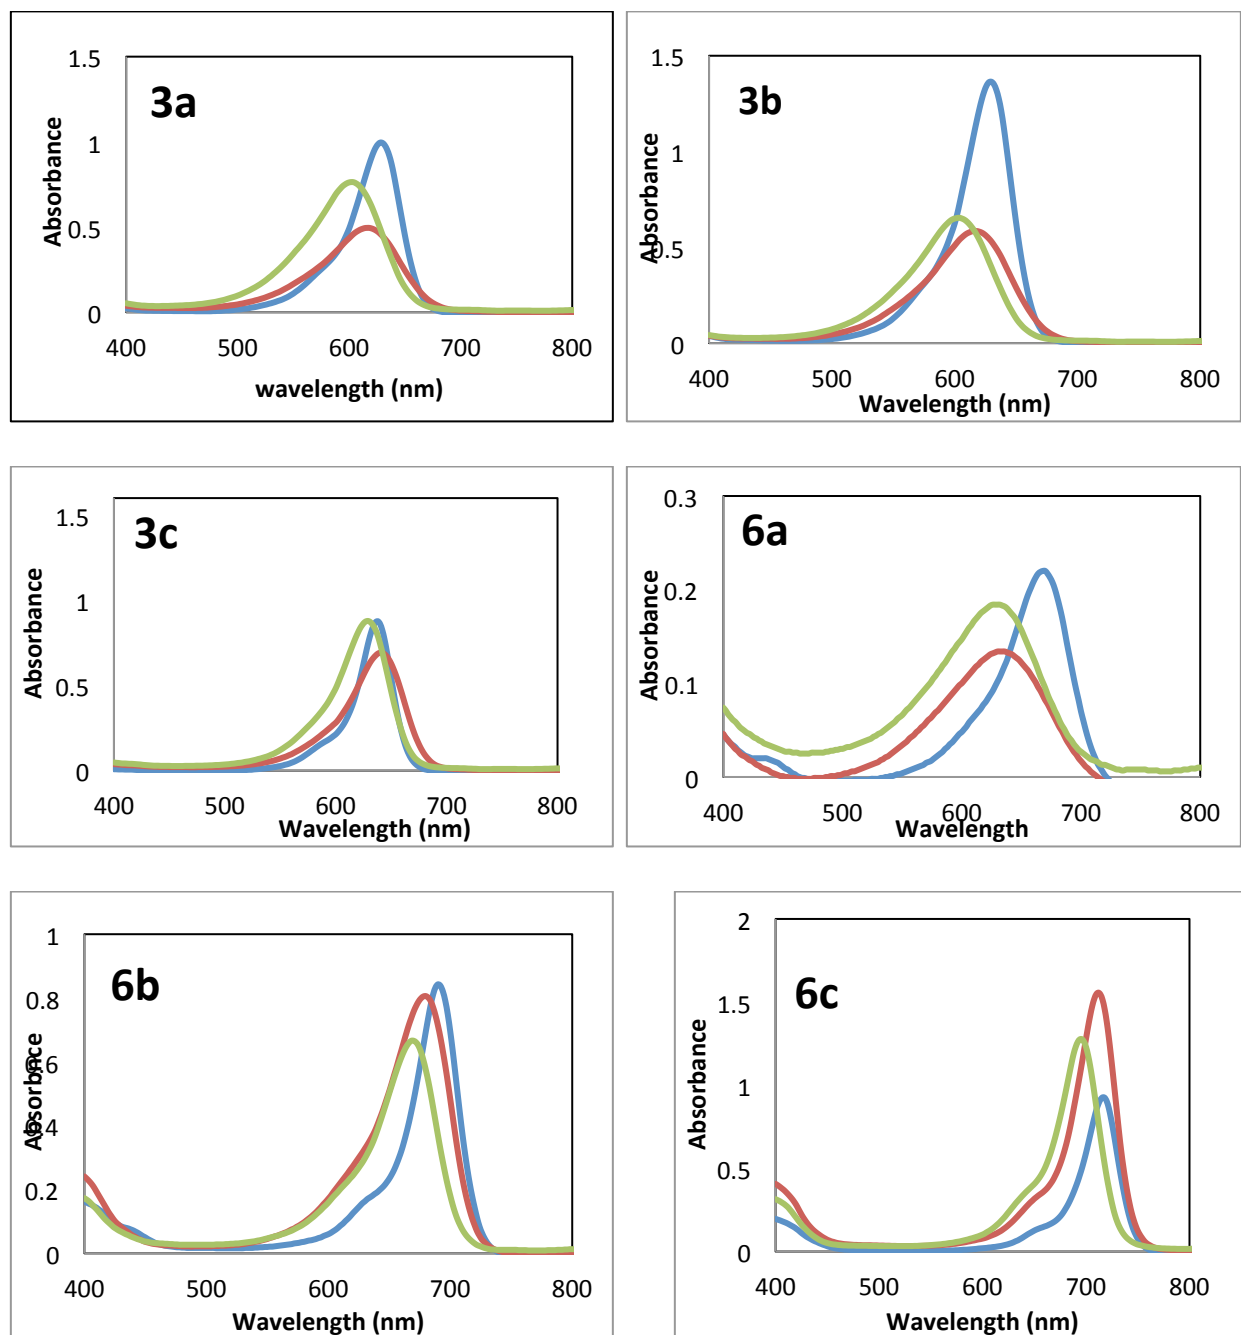

**Figure S1:** UV spectrum for 10  $\mu\text{M}$  3a-3c, 6a-6c in different solvents:  $\text{CHCl}_3$  (blue line); DMSO (red line); MeOH (green line)

#### 4. Cyclic voltammetry

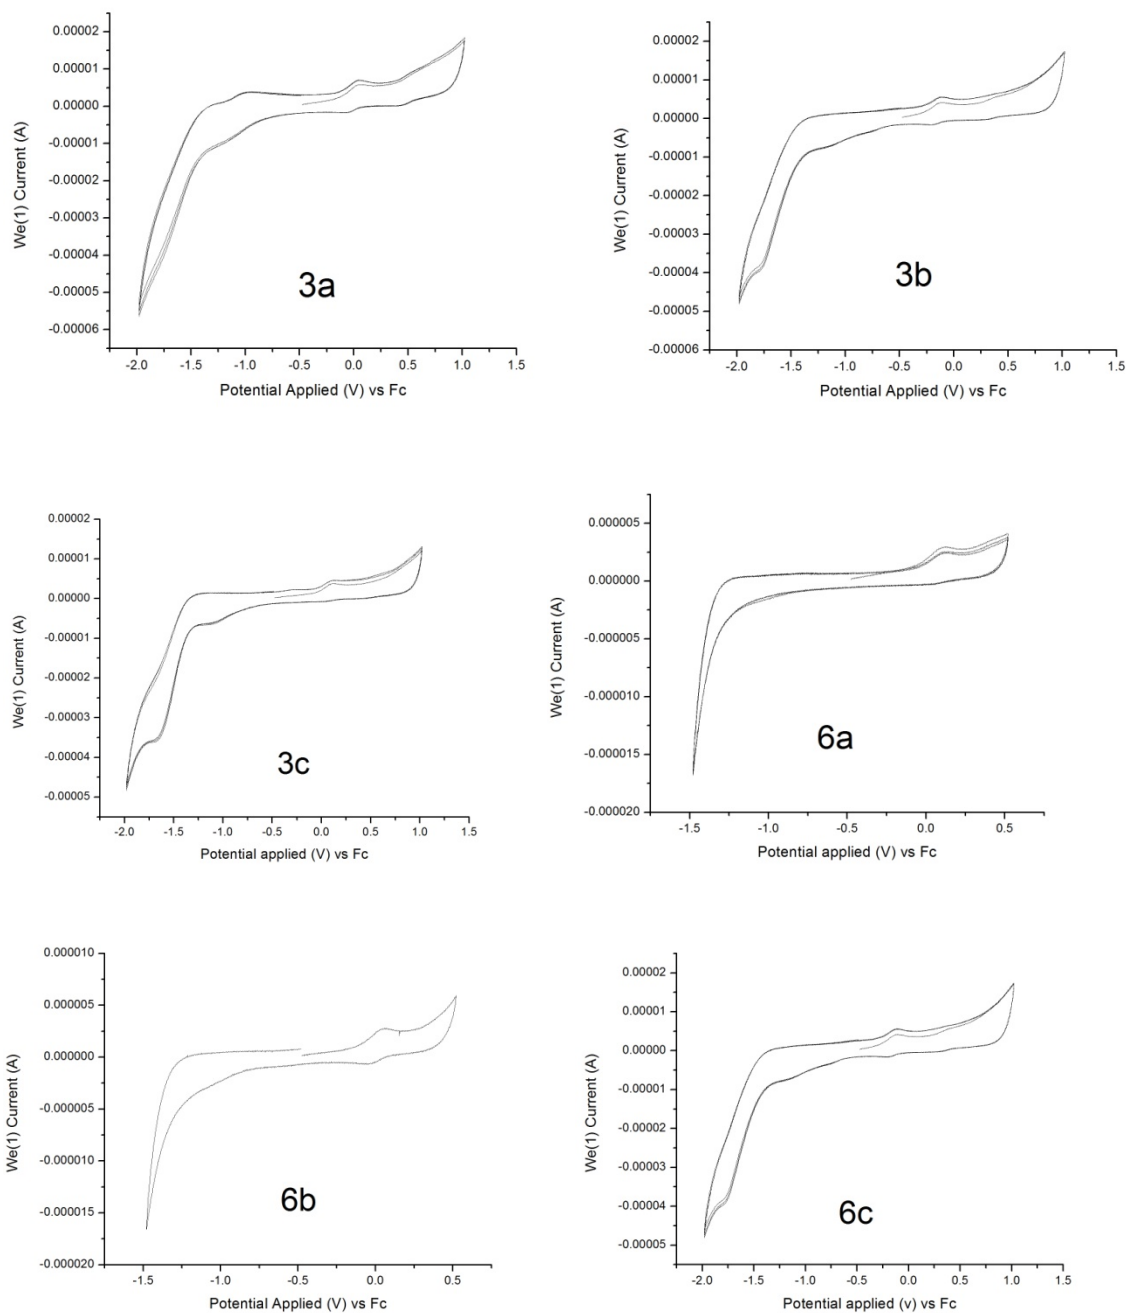

**Figure S2:** Cyclic voltammograms of **3a-3c**, **6a-6c** in 0.1 M TBAHF DCM solutions at a scan rate of 100 mV/s. Ferrocene is used as the internal standard.

The HOMO and LUMO levels were obtained according to equations (1) and (2), respectively.<sup>[3]</sup> And all the results were summarized in the Table 1.

$$E_{\text{HOMO}}^{\text{opt}} = -5.23\text{eV} - eE_{\text{ox}} + 1/2(E_{\text{cv}}^{\text{sol}} - E_{\text{g}}) \quad (1)$$

$$E_{\text{LUMO}}^{\text{opt}} = -5.23\text{eV} - eE_{\text{red}} - 1/2(E_{\text{cv}}^{\text{sol}} - E_{\text{g}}) \quad (2)$$

**Table S1.** Electrochemical properties of squaraine dyes in CH<sub>2</sub>Cl<sub>2</sub>.

| Dye <sup>[a]</sup> | $\lambda_{\text{max}}(\text{nm})$ | $\lambda_{\text{ons}}(\text{nm})$ | $E_{\text{g}}$<br>(eV) | $E_{\text{ox}}$ (eV) | $E_{\text{red}}(\text{eV})$ | $E_{\text{cv}}^{\text{sol}}$ (eV) | $E_{\text{HOMO}}^{\text{opt}}$ (eV) | $E_{\text{LUMO}}^{\text{opt}}$ (eV) |
|--------------------|-----------------------------------|-----------------------------------|------------------------|----------------------|-----------------------------|-----------------------------------|-------------------------------------|-------------------------------------|
| <b>3a</b>          | 623                               | 673                               | 1.84                   | -0.15                | -1.36                       | 1.21                              | -5.39                               | -3.56                               |
| <b>3b</b>          | 625                               | 675                               | 1.83                   | -0.13                | -1.42                       | 1.29                              | -5.37                               | -3.54                               |
| <b>3c</b>          | 638                               | 676                               | 1.83                   | -0.05                | -1.36                       | 1.31                              | -5.44                               | <b>-3.61</b>                        |
| <b>6a</b>          | 660                               | 718                               | 1.73                   | -0.08                | -1.30                       | 1.22                              | -5.40                               | <b>-3.67</b>                        |
| <b>6b</b>          | 690                               | 727                               | 1.71                   | -0.14                | -1.23                       | 1.09                              | -5.40                               | <b>-3.69</b>                        |
| <b>6c</b>          | 718                               | 750                               | <b>1.65</b>            | -0.28                | -1.43                       | 1.15                              | -5.20                               | -3.55                               |

[a] CV measurement was conducted in a three electrode cell consisting of reference electrode (Ag/AgCl), working electrode (Pt) and counter electrode

## 5. Emission Spectrum for 10uM dyes in DMSO

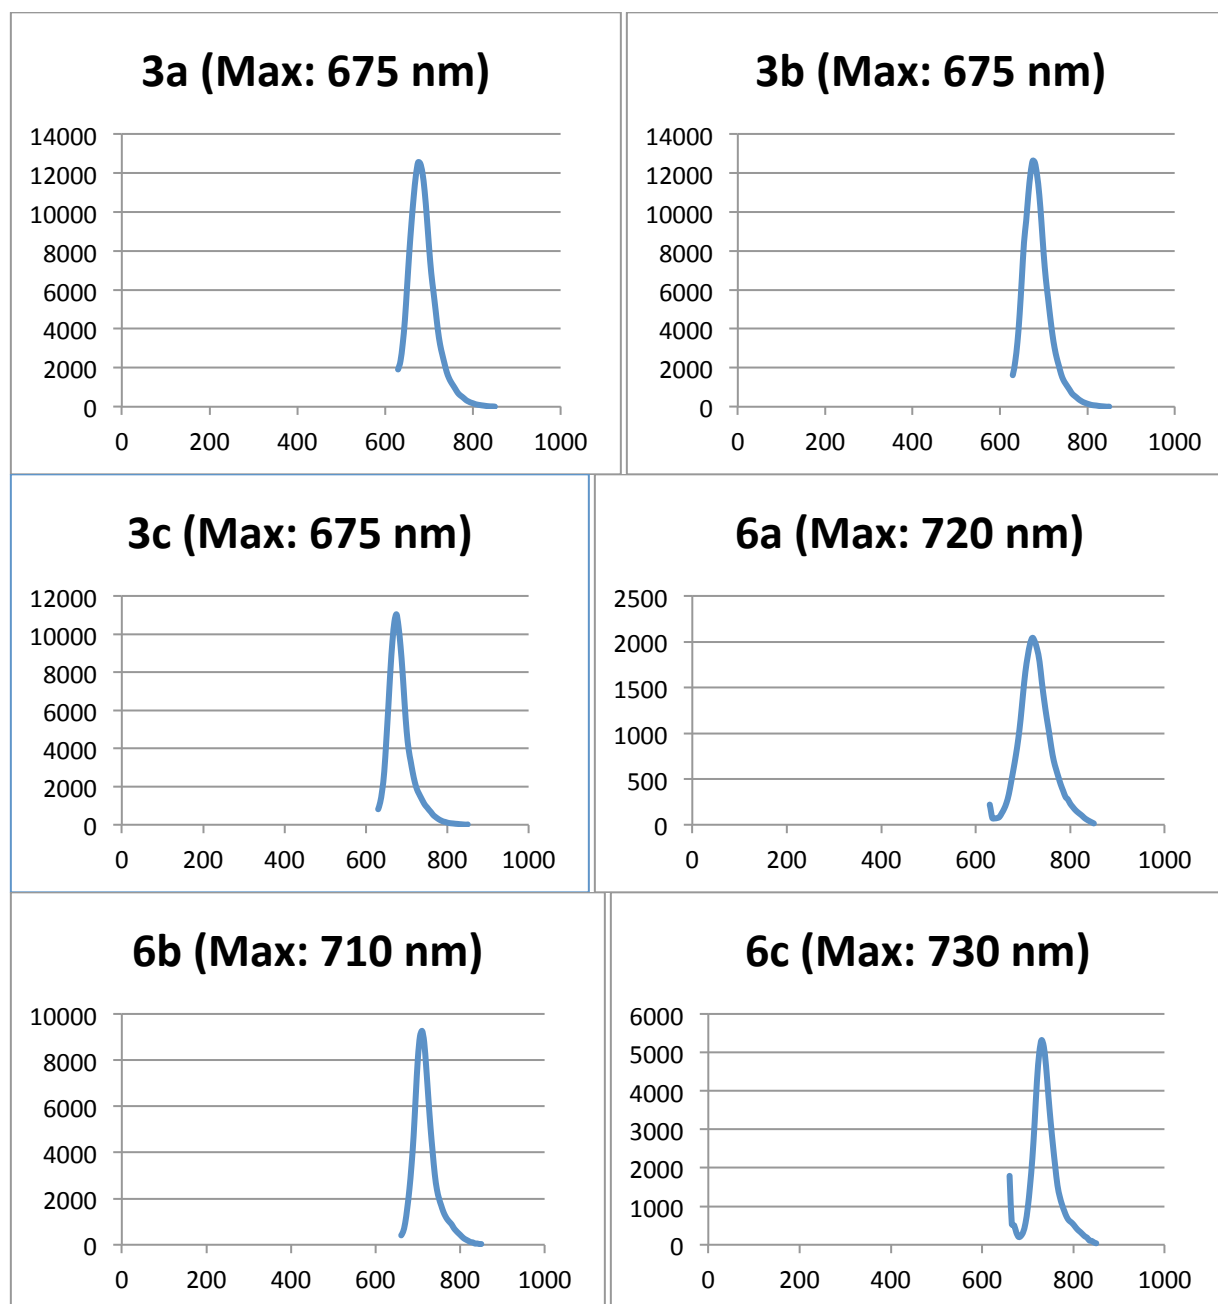

**Figure S3:** Emission spectra of **3a-3c**, **6a-6c** in DMSO (10 mM).

## 6. References:

- [1] a) L-H. Liu, K. Nakatani, R. Pansu, J-J. Vachon, P. Tauc and E. Ishow, *Adv. Mater.*, **2007**, 19, 433-436. b) V. Ramalingam, M. E. Domaradzki, S. Jang and R. S. Muthyala, *Org. Lett.*, **2008**, 15, 3315.
- [2] a) U. mayerhoffer, M. Gsanger, M. Stolte, B. Fimmel and F. Wurthner, *Chem. Eur. J.*, **2013**, 19, 218-232. b) S. Kim, G. K. Mor, M. Paulose, O. K. Varghese, C. Baik and C. A. Grimes, *Langmuir*, **2010**, 26, 13486-13492.
- [3] L. Beverina, M. Drees, A. Facchetti, M. Salamone, R. Ruffo and G. A. Pagani, *Eur. J. Org. Chem.* 2011, 5555-5563.

## 7. TDDFT Benchmark Studies

**Table S2.** Benchmark TDDFT studies of 3a, 6a-c in DMSO.

| Dye       | TDDFT Method                  | Structure optimized Method | DMSO Solvation Method | $\lambda_{\text{abs}}(\text{nm})$ | $\lambda_{\text{em}}(\text{nm})$ | $\Delta\lambda(\text{nm})$ |
|-----------|-------------------------------|----------------------------|-----------------------|-----------------------------------|----------------------------------|----------------------------|
| <b>3a</b> | CAM-B3LYP/6-311+G(d,p)        | $\omega$ B97x-D/6-31G(d)   | SMD                   | 520.44                            | 597.56                           | 77.12                      |
|           | CAM-B3LYP/6-311+G(d,p)        | $\omega$ B97x-D/6-31G(d)   | PCM                   | 518.97                            | 581.94                           | 62.97                      |
|           | $\omega$ B97x-D /6-311+G(d,p) | $\omega$ B97x-D/6-31G(d)   | SMD                   | 510.58                            | 596.43                           | 85.85                      |
|           | LC-BLYP/6-311+G(d,p)          | $\omega$ B97x-D/6-31G(d)   | SMD                   | 480.4                             | 600.64                           | 120.24                     |
|           | B3LYP/6-311+G(d,p)            | $\omega$ B97x-D/6-31G(d)   | SMD                   | 572.1                             | 605.68                           | 33.58                      |
|           | PBE0/6-31+G(d)                | $\omega$ B97x-D/6-31G(d)   | SMD                   | 559.68                            | 598.27                           | 38.59                      |
|           | CAM-B3LYP/6-311+G(d,p)        | PBE0/6-31+G(d)             | SMD                   | 544.08                            | 583.49                           | 39.41                      |
|           | PBE0/6-311+G(d,p)             | PBE0/6-31+G(d)             | SMD                   | 569.81                            | 594.41                           | 24.6                       |
|           | <b>CAM-B3LYP/6-311+G(d,p)</b> | <b>CAM-B3LYP/6-31+G(d)</b> | <b>PCM</b>            | <b>520.75</b>                     | <b>580.27</b>                    | <b>59.52</b>               |
| <b>6a</b> | CAM-B3LYP/6-311+G(d,p)        | $\omega$ B97x-D/6-31G(d)   | SMD                   | 519.91                            | 609.05                           | 89.14                      |
|           | CAM-B3LYP/6-311+G(d,p)        | $\omega$ B97x-D/6-31G(d)   | PCM                   | 527.74                            | 606.28                           | 78.54                      |
|           | $\omega$ B97x-D /6-311+G(d,p) | $\omega$ B97x-D/6-31G(d)   | SMD                   | 507.28                            | 606.91                           | 99.63                      |
|           | LC-BLYP/6-311+G(d,p)          | $\omega$ B97x-D/6-31G(d)   | SMD                   | 464.47                            | 598.91                           | 134.44                     |
|           | B3LYP/6-311+G(d,p)            | $\omega$ B97x-D/6-31G(d)   | SMD                   | 594.78                            | 632.07                           | 37.29                      |
|           | PBE0/6-31+G(d)                | $\omega$ B97x-D/6-31G(d)   | SMD                   | 579.15                            | 622.53                           | 43.38                      |
|           | CAM-B3LYP/6-311+G(d,p)        | PBE0/6-31+G(d)             | SMD                   | 588.95                            | 619.79                           | 30.84                      |
|           | PBE0/6-311+G(d,p)             | PBE0/6-31+G(d)             | SMD                   | 545.55                            | 608.43                           | 62.88                      |
|           | <b>CAM-B3LYP/6-311+G(d,p)</b> | <b>CAM-B3LYP/6-31+G(d)</b> | <b>PCM</b>            | <b>531.1</b>                      | <b>605.83</b>                    | <b>74.73</b>               |

|           |                               |                            |            |               |               |              |
|-----------|-------------------------------|----------------------------|------------|---------------|---------------|--------------|
| <b>6b</b> | CAM-B3LYP/6-311+G(d,p)        | $\omega$ B97x-D/6-31G(d)   | SMD        | 575.53        | 614.43        | 38.9         |
|           | CAM-B3LYP/6-311+G(d,p)        | $\omega$ B97x-D/6-31G(d)   | PCM        | 578.44        | 615.74        | 37.3         |
|           | $\omega$ B97x-D /6-311+G(d,p) | $\omega$ B97x-D/6-31G(d)   | SMD        | 571.93        | 613.23        | 41.3         |
|           | B3LYP/6-311+G(d,p)            | $\omega$ B97x-D/6-31G(d)   | SMD        | 604.12        | 634.43        | 30.31        |
|           | PBE0/6-31+G(d)                | $\omega$ B97x-D/6-31G(d)   | SMD        | 593.35        | 623.96        | 30.61        |
|           | <b>CAM-B3LYP/6-311+G(d,p)</b> | <b>CAM-B3LYP/6-31+G(d)</b> | <b>PCM</b> | <b>578.66</b> | <b>615.17</b> | <b>36.51</b> |
| <br>      |                               |                            |            |               |               |              |
| <b>6c</b> | CAM-B3LYP/6-311+G(d,p)        | $\omega$ B97x-D/6-31G(d)   | SMD        | 595.68        | 630.96        | 35.28        |
|           | CAM-B3LYP/6-311+G(d,p)        | $\omega$ B97x-D/6-31G(d)   | PCM        | 599.06        | 632.42        | 33.36        |
|           | $\omega$ B97x-D /6-311+G(d,p) | $\omega$ B97x-D/6-31G(d)   | SMD        | 591.13        | 627.7         | 36.57        |
|           | B3LYP/6-311+G(d,p)            | $\omega$ B97x-D/6-31G(d)   | SMD        | 622.27        | 651.01        | 28.74        |
|           | PBE0/6-31+G(d)                | $\omega$ B97x-D/6-31G(d)   | SMD        | 611.05        | 639.81        | 28.76        |
|           | <b>CAM-B3LYP/6-311+G(d,p)</b> | <b>CAM-B3LYP/6-31+G(d)</b> | <b>PCM</b> | <b>600.75</b> | <b>632.47</b> | <b>31.72</b> |

---



8. 3a, 6a-c HOMO and LUMO of Ground and Excited state

3a

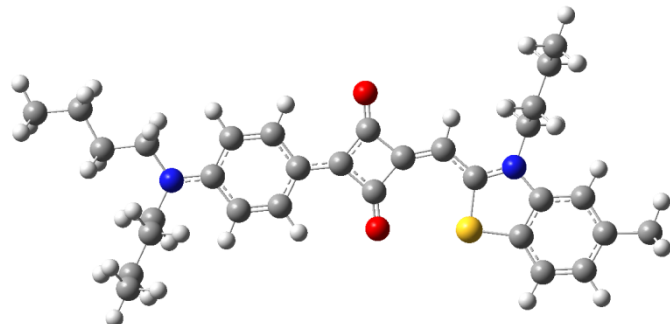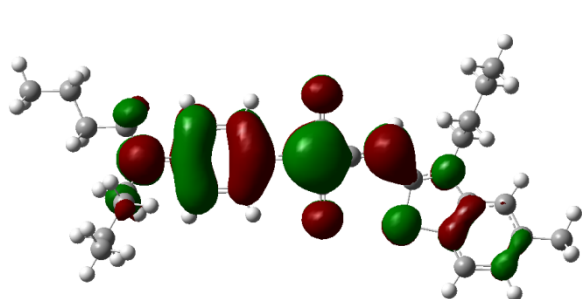

3a S<sub>0</sub> HOMO

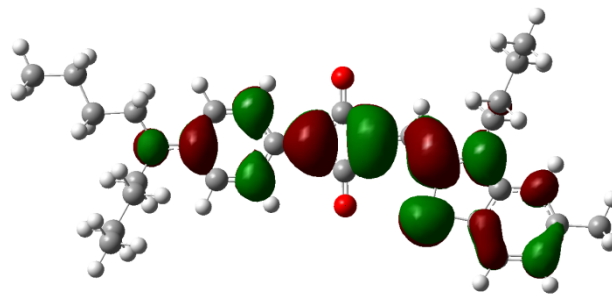

3a S<sub>0</sub> LUMO

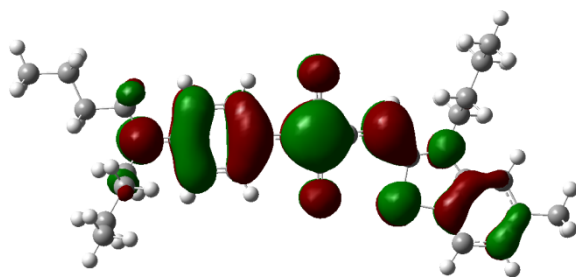

3a S<sub>1</sub> HOMO

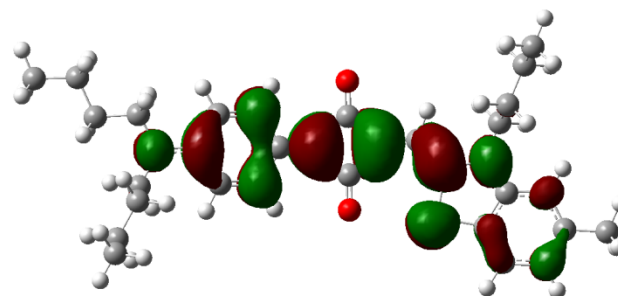

3a S<sub>1</sub> LUMO

Figure S4. 3a HOMO and LUMO of S<sub>0</sub> and S<sub>1</sub>.

6a

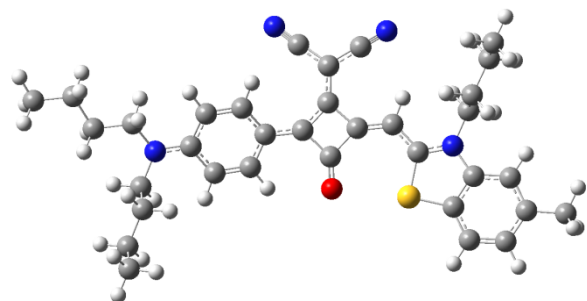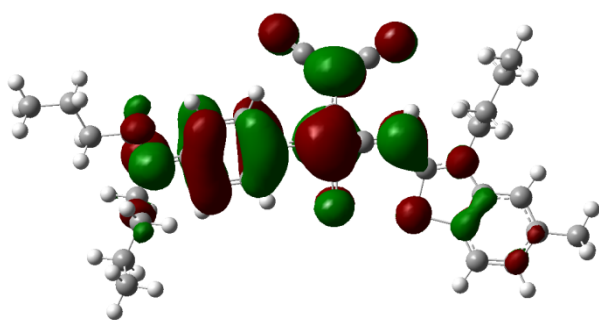

6a  $S_0$  HOMO

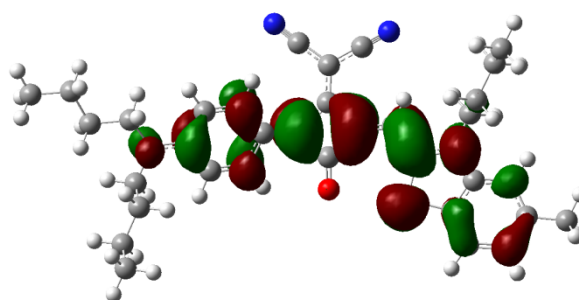

6a  $S_0$  LUMO

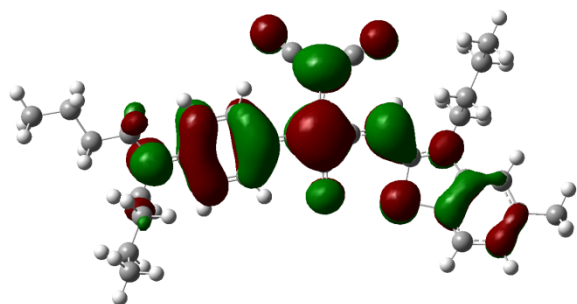

6a  $S_1$  HOMO

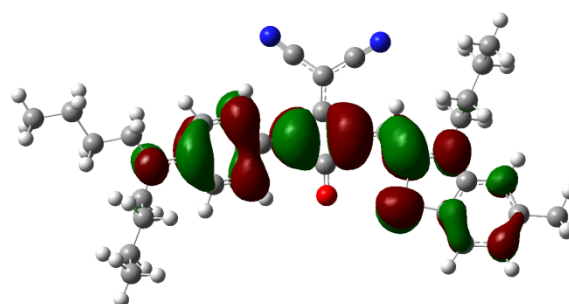

6a  $S_1$  LUMO

Figure S5. 6a HOMO and LUMO of  $S_0$  and  $S_1$

6b

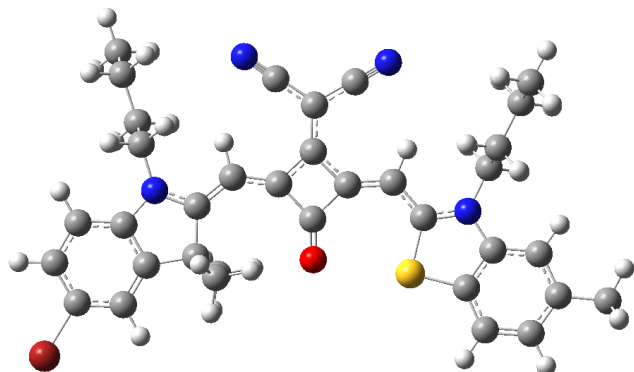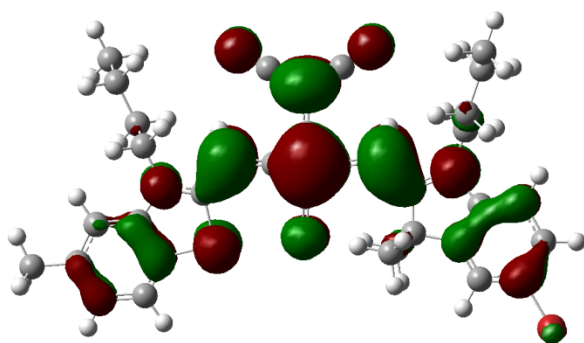

6b S<sub>0</sub> HOMO

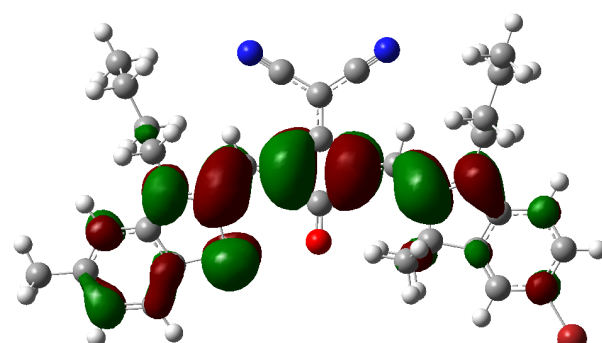

6b S<sub>0</sub> LUMO

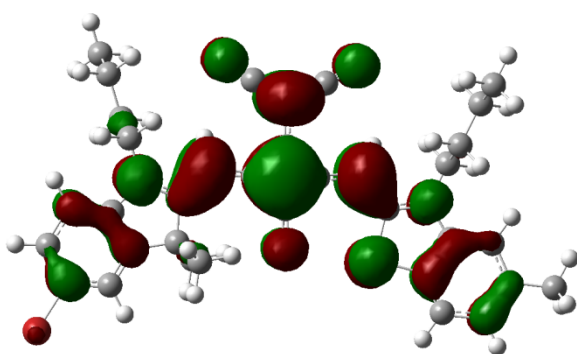

6b S<sub>1</sub> HOMO

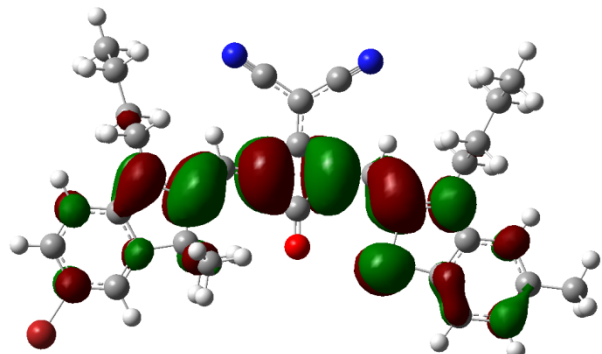

6b S<sub>1</sub> LUMO

Figure S6. 6b HOMO and LUMO of S<sub>0</sub> and S<sub>1</sub>

6c

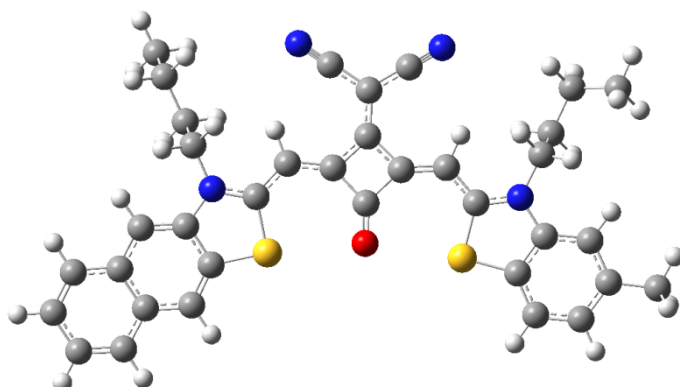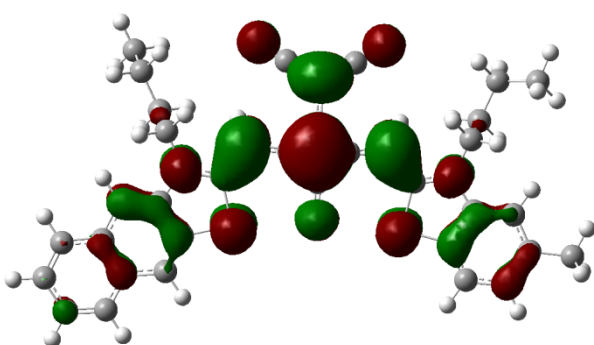

6c S<sub>0</sub> HOMO

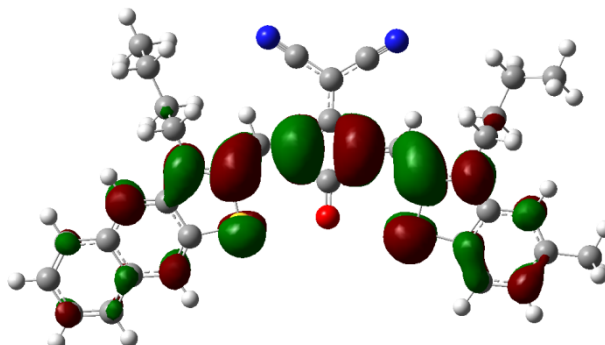

6c S<sub>0</sub> LUMO

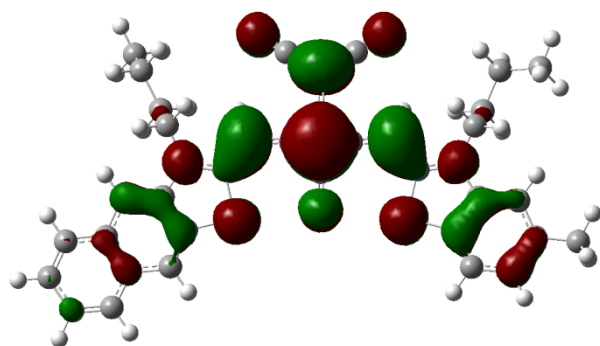

6c S<sub>1</sub> HOMO

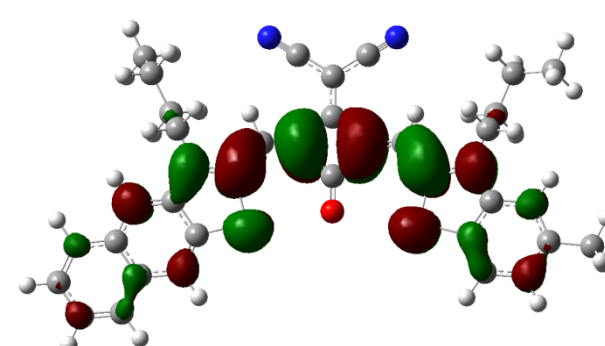

6c S<sub>1</sub> LUMO

Figure S7. 6c HOMO and LUMO of S<sub>0</sub> and S<sub>1</sub>

### 9. 3a, 6a-c Reduced Density Gradient isosurface plot

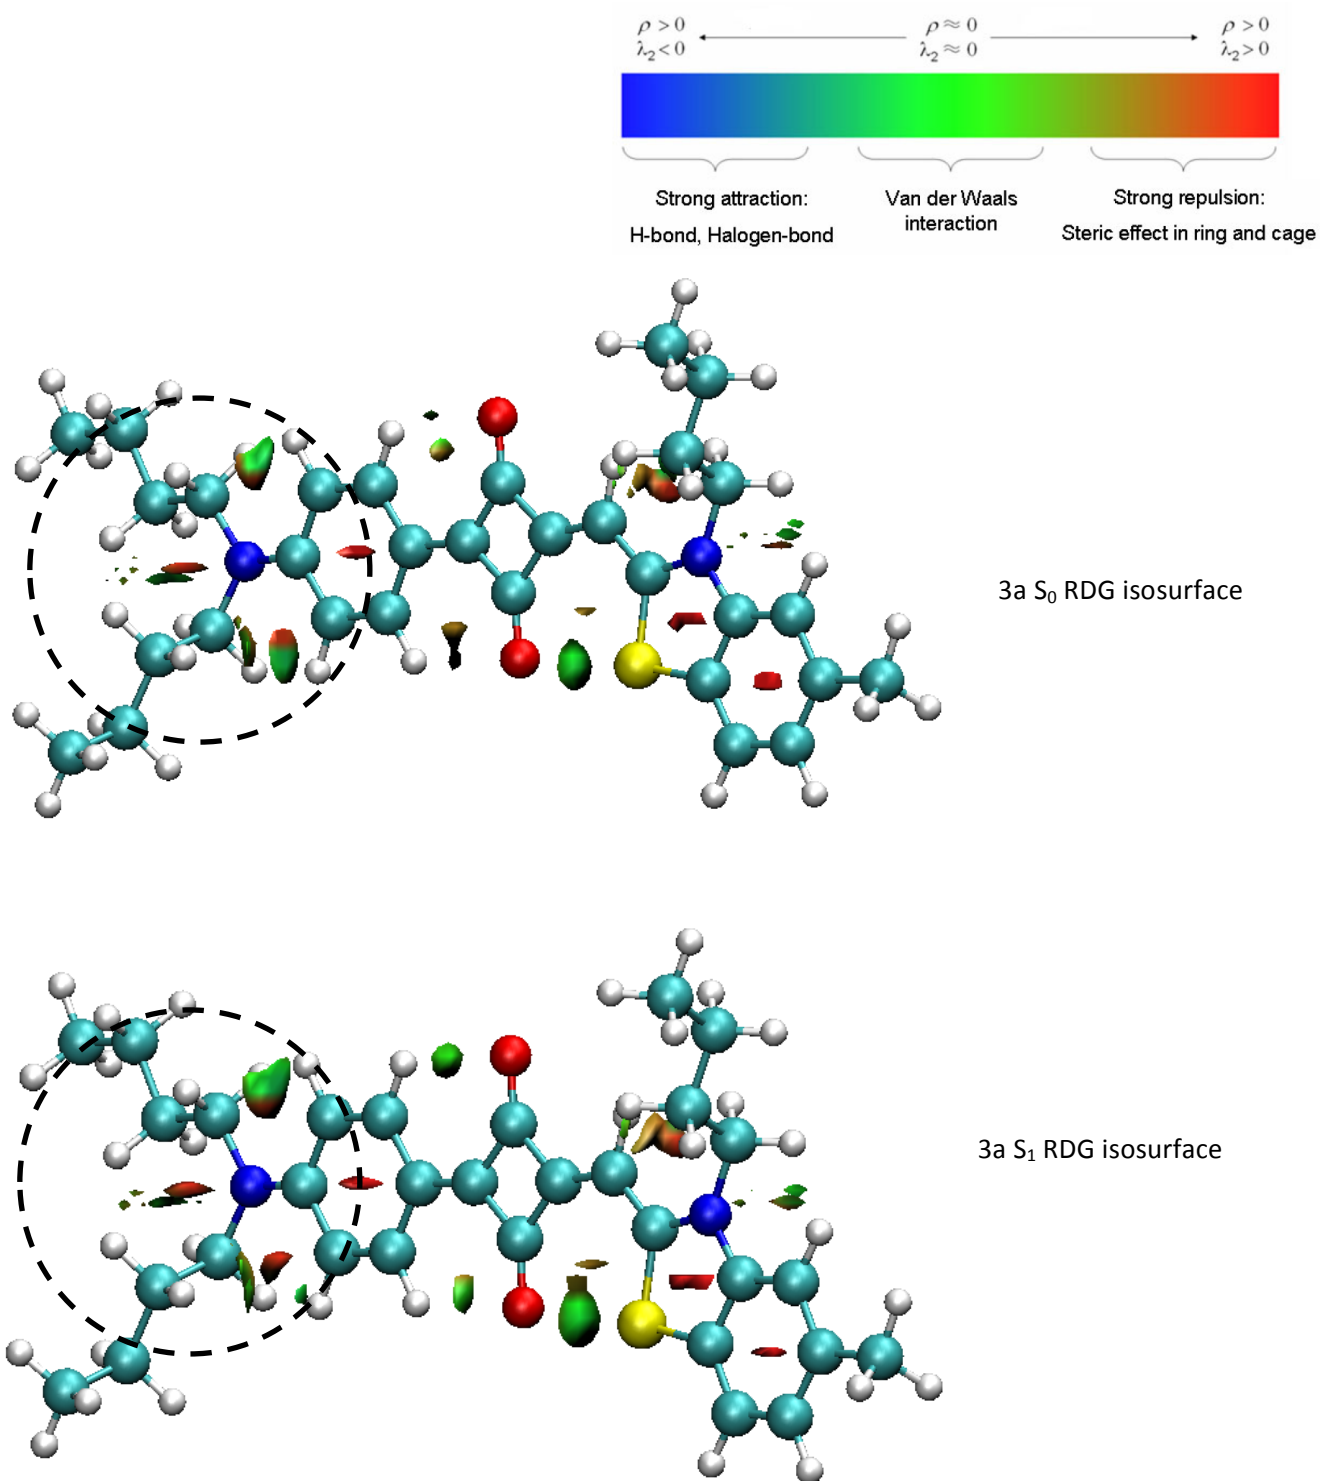

**Figure S8.** 3a  $S_0$  and  $S_1$  RDG analysis where the increase in red isosurface signifying steric repulsion increases

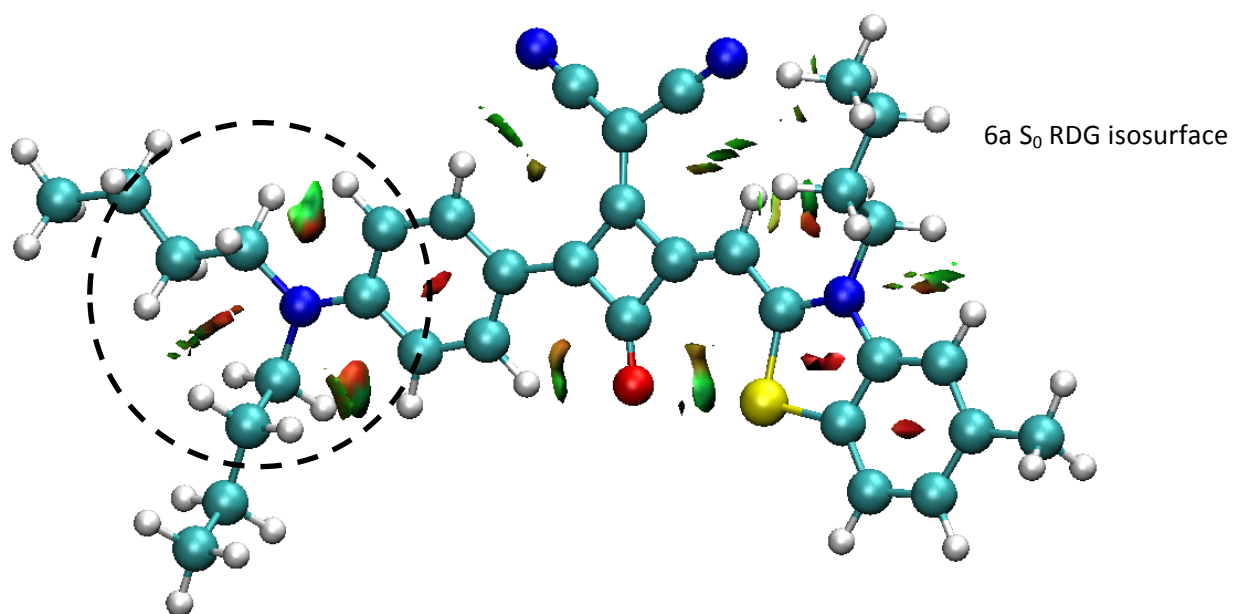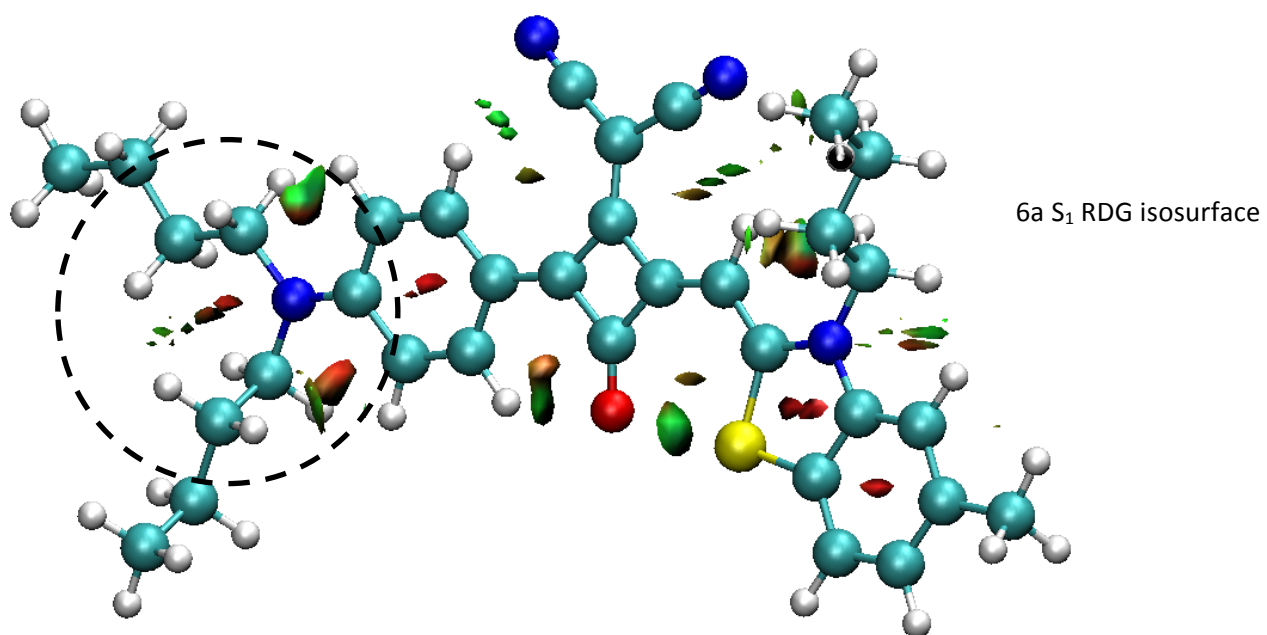

**Figure S9.** 6a  $S_0$  and  $S_1$  RDG analysis where the increase in red isosurface signifying an increase steric repulsion

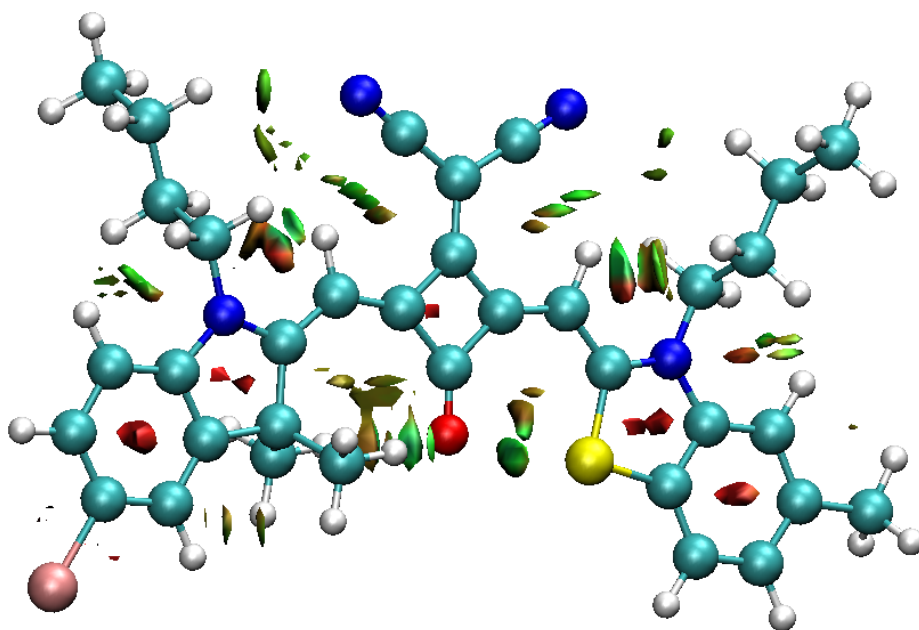

6b  $S_0$  RDG isosurface

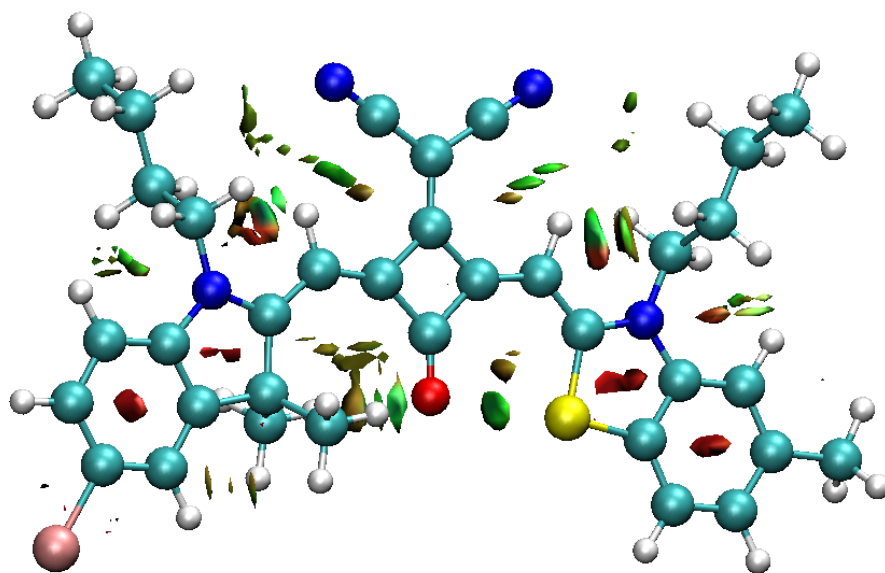

6b  $S_1$  RDG isosurface

**Figure S10.** 6b  $S_0$  and  $S_1$  RDG analysis

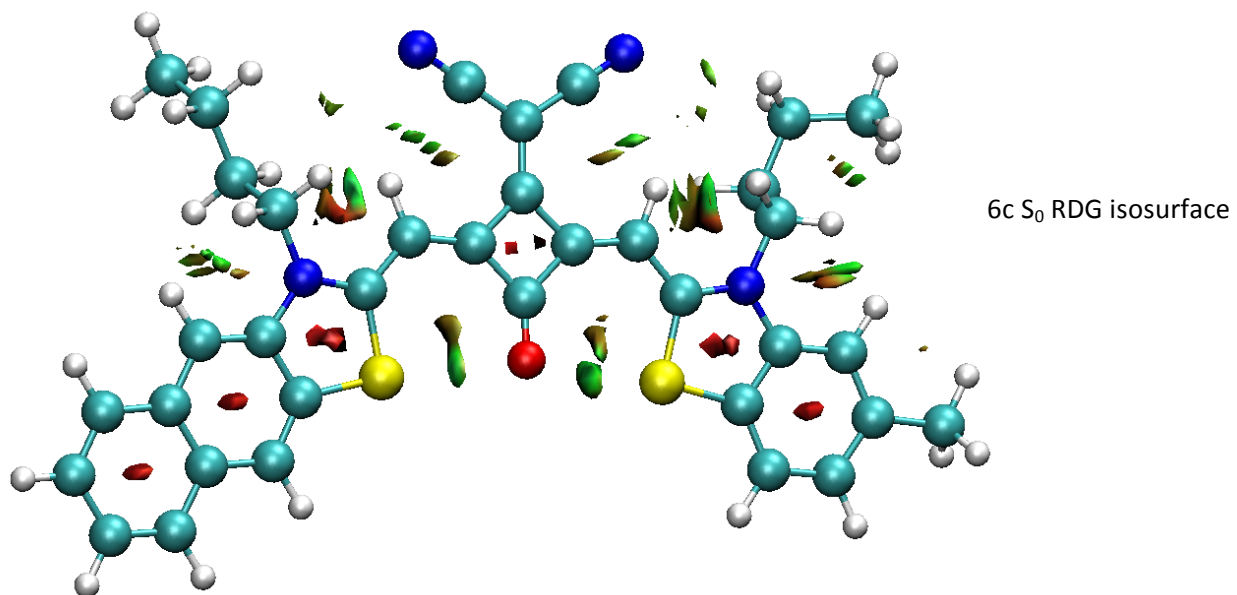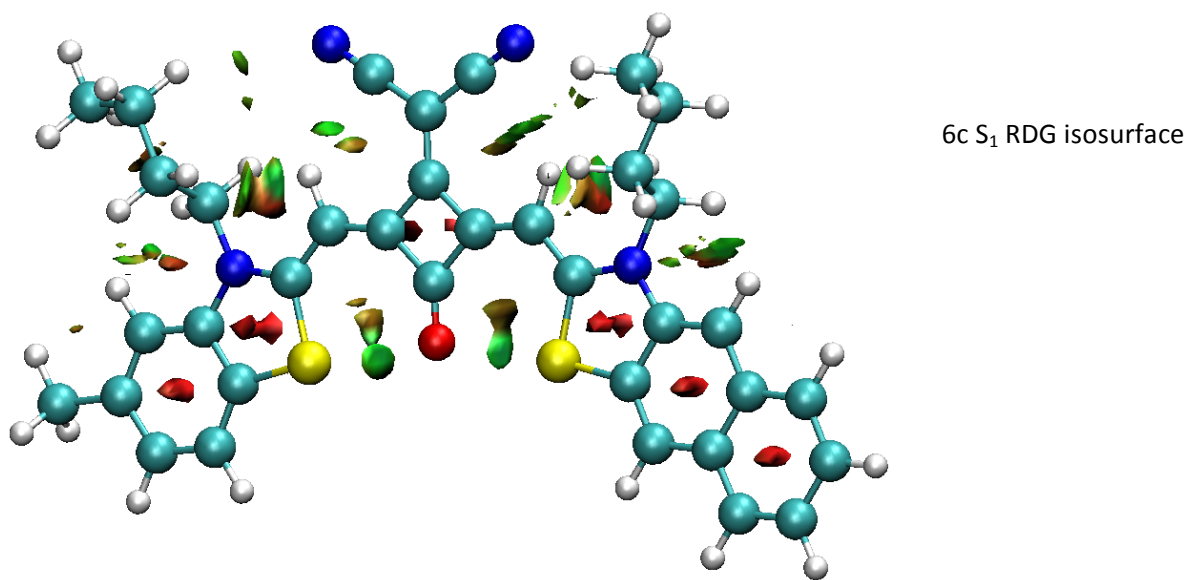

**Figure S11.** 6c S<sub>0</sub> and S<sub>1</sub> RDG analysis



### 10. 3a, 6a-c S<sub>0</sub> and S<sub>1</sub> dihedral angle deviation from planarity

| Substrate               | $\Delta r/\text{\AA}$ | $\theta_a$      | $\theta_{a2}$   | $\theta_b$      | $\theta_c$      | $\theta_d$      | $\theta_e$      |
|-------------------------|-----------------------|-----------------|-----------------|-----------------|-----------------|-----------------|-----------------|
| <b>3a S<sub>0</sub></b> | 3.14                  | 6.3             | 14.5            | 0.6             | 0.3             | 0.7             | 2.7             |
|                         |                       | C44-N43-C40-C38 | C50-N43-C40-C36 | C35-C33-C16-C14 | C33-C16-C14-O70 | C14-C13-C11-C10 | C13-C11-C10-N30 |
| <b>3a S<sub>1</sub></b> | 2.70                  | 3.6             | 7.8             | 0.2             | 0.7             | 0.7             | 1.3             |
|                         |                       | C44-N43-C40-C38 | C50-N43-C40-C36 | C35-C33-C16-C14 | C33-C16-C14-O70 | C14-C13-C11-C10 | C13-C11-C10-N30 |
| <b>6a S<sub>0</sub></b> | 3.31                  | 5.9             | 13.0            | 17.7            | 7.0             | 1.3             | 2.9             |
|                         |                       | C49-N48-C45-C43 | C55-N48-C45-C41 | C40-C38-C16-C14 | C16-C14-C18-C19 | C14-C13-C11-C10 | C13-C11-C10-N33 |
| <b>6a S<sub>1</sub></b> | 1.48                  | 3.9             | 5.7             | 5.6             | 2.3             | 1.2             | 1.2             |
|                         |                       | C49-N48-C45-C43 | C55-N48-C45-C41 | C40-C38-C16-C14 | C16-C14-C18-C19 | C14-C13-C11-C10 | C13-C11-C10-N33 |
| <b>6b S<sub>0</sub></b> | 1.30                  | 1.6             | ----            | 0.4             | 0.8             | 0.5             | 2.8             |
|                         |                       | N58-C32-C30-C29 |                 | C32-C30-C29-C27 | C29-C27-C43-C44 | C27-C26-C24-C23 | C26-C24-C23-N59 |
| <b>6b S<sub>1</sub></b> | 0.65                  | 1.2             | ----            | 0.2             | 0.3             | 0.6             | 1.5             |
|                         |                       | N58-C32-C30-C29 |                 | C32-C30-C29-C27 | C29-C27-C43-C44 | C27-C26-C24-C23 | C26-C24-C23-N59 |
| <b>6c S<sub>0</sub></b> | 0.83                  | 2.4             | ----            | 2.3             | 0.4             | 1.3             | 2.4             |
|                         |                       | N58-C22-C23-C25 |                 | C22-C23-C25-C26 | C25-C26-C42-C41 | C26-C28-C29-C31 | C28-C29-C31-N57 |
| <b>6b S<sub>1</sub></b> | 0.74                  | 1.8             | ----            | 1.1             | 0.2             | 0.8             | 1.4             |
|                         |                       | N58-C22-C23-C25 |                 | C22-C23-C25-C26 | C25-C26-C42-C41 | C26-C28-C29-C31 | C28-C29-C31-N57 |

$\theta$  is calculated as the dihedral angle deviation from planarity where the values are taken from the modulus the difference of dihedral angle from 180° or 0° (i.e. 180°-|x| if x > 90° or |x|-0 if x < =90°), whichever is nearer to attaining a planar structure. The dihedral angles taken are shown in the figure below and also listed by its atomic label below its value in Table S2.

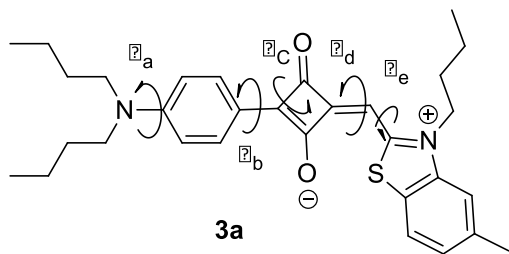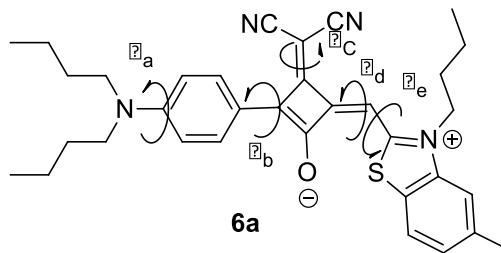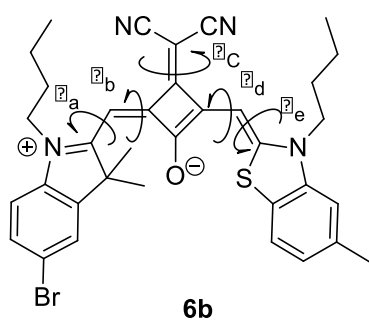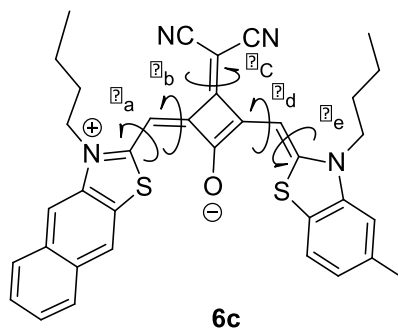

## 11. 3a, 6a-c S<sub>0</sub> and S<sub>1</sub> Cartesian coordinates

### 3a S<sub>0</sub> CAMB3LYP/6-31+G(d) PCM Optimized Structure in DMSO

|     |             |             |             |
|-----|-------------|-------------|-------------|
| 0 1 |             |             |             |
| C   | 6.09406200  | -0.69229200 | -0.32204500 |
| C   | 7.48847100  | -0.63060600 | -0.31663600 |
| H   | 8.00935600  | 0.31999600  | -0.30933300 |
| C   | 8.21728000  | -1.81467700 | -0.31115500 |
| C   | 7.53607600  | -3.04554300 | -0.30954600 |
| H   | 8.11056700  | -3.96728000 | -0.30526900 |
| C   | 6.15230500  | -3.11206200 | -0.30930100 |
| H   | 5.64101800  | -4.06883900 | -0.30483200 |
| C   | 5.43512500  | -1.91849400 | -0.31293000 |
| C   | 3.89815700  | 0.03136600  | -0.30945200 |
| C   | 2.83684400  | 0.96702600  | -0.27365100 |
| H   | 3.10591800  | 2.01528400  | -0.20520200 |
| C   | 1.49817700  | 0.69894100  | -0.29665800 |
| C   | 0.33588300  | 1.61782500  | -0.24900300 |
| C   | 0.53397500  | -0.43308000 | -0.37992300 |
| C   | -0.57002900 | 0.49856200  | -0.32766000 |
| C   | 5.66577900  | 1.77800300  | -0.36373100 |
| H   | 4.95668500  | 2.36163900  | -0.95167900 |
| H   | 6.60453700  | 1.78742500  | -0.91936900 |
| C   | 5.84976800  | 2.36355300  | 1.03397300  |
| H   | 6.55227700  | 1.73867400  | 1.59841200  |
| H   | 4.89454800  | 2.33087800  | 1.57150400  |
| C   | 6.36430200  | 3.80123800  | 0.97779000  |
| H   | 7.31634300  | 3.82516600  | 0.43222200  |
| H   | 5.66069200  | 4.41674100  | 0.40292800  |
| C   | 6.55573000  | 4.40549600  | 2.36690500  |
| H   | 6.92672200  | 5.43334700  | 2.30236300  |
| H   | 7.27693000  | 3.82492800  | 2.95319100  |
| H   | 5.61125400  | 4.42444300  | 2.92218800  |
| N   | 5.19822600  | 0.38432300  | -0.33717000 |
| O   | 0.65029900  | -1.66126000 | -0.46378300 |
| S   | 3.70142800  | -1.69557500 | -0.30235900 |
| C   | -1.99415300 | 0.35649800  | -0.35535700 |
| C   | -2.60445200 | -0.90962600 | -0.44032300 |
| C   | -2.84335600 | 1.47490500  | -0.28851300 |
| C   | -3.97728800 | -1.05139800 | -0.46755200 |
| H   | -1.97779400 | -1.79517800 | -0.48066500 |
| C   | -4.21964300 | 1.34405300  | -0.31608000 |
| H   | -2.40669300 | 2.46556200  | -0.20639400 |
| C   | -4.84014900 | 0.07395000  | -0.42597100 |
| H   | -4.38186600 | -2.05321400 | -0.52178500 |
| H   | -4.81560700 | 2.24347800  | -0.24484000 |
| N   | -6.21013800 | -0.05546000 | -0.50380300 |
| C   | -7.03234500 | 1.14685300  | -0.32976400 |
| H   | -6.90606600 | 1.54876300  | 0.68805500  |
| H   | -6.65679000 | 1.91009600  | -1.01814600 |

|   |              |             |             |
|---|--------------|-------------|-------------|
| C | -8.52044400  | 0.97440000  | -0.61507900 |
| H | -8.66116300  | 0.53945800  | -1.61266800 |
| H | -8.98047400  | 0.28760500  | 0.10485300  |
| C | -6.82895700  | -1.36463800 | -0.31426400 |
| H | -7.83058300  | -1.33162100 | -0.74329700 |
| H | -6.28777900  | -2.10341400 | -0.91036200 |
| C | -6.90970700  | -1.81677500 | 1.14572700  |
| H | -5.90274000  | -1.83207600 | 1.58135000  |
| H | -7.48674700  | -1.07884400 | 1.71890400  |
| C | -7.55281600  | -3.19499800 | 1.29046500  |
| H | -8.55627200  | -3.17630700 | 0.84477200  |
| H | -6.97294800  | -3.92721200 | 0.71289600  |
| C | -7.64936400  | -3.65447500 | 2.74368300  |
| H | -8.25259300  | -2.95814400 | 3.33758900  |
| H | -8.11073100  | -4.64475200 | 2.81919700  |
| H | -6.65668900  | -3.71155900 | 3.20498400  |
| C | -9.24925400  | 2.31746900  | -0.54491700 |
| H | -8.81543900  | 3.00612300  | -1.28129500 |
| H | -9.08113100  | 2.77150400  | 0.44042100  |
| C | -10.74978100 | 2.18354600  | -0.79371200 |
| H | -11.21608700 | 1.52730200  | -0.04989700 |
| H | -11.24912700 | 3.15655300  | -0.74056900 |
| H | -10.94923400 | 1.75907000  | -1.78439500 |
| O | 0.24116700   | 2.84926500  | -0.17295200 |
| C | 9.72367100   | -1.78825200 | -0.30483500 |
| H | 10.10468400  | -0.76406600 | -0.29992900 |
| H | 10.12093200  | -2.30269600 | 0.57639900  |
| H | 10.12768300  | -2.29632100 | -1.18677500 |

### 3a S<sub>1</sub> CAMB3LYP/6-31+G(d) PCM Optimized Structure in DMSO

|   |             |             |             |
|---|-------------|-------------|-------------|
| 0 | 1           |             |             |
| C | 6.12089400  | -0.69114000 | -0.30456700 |
| C | 7.51996800  | -0.64799000 | -0.27293700 |
| H | 8.04809200  | 0.29878500  | -0.26300500 |
| C | 8.24159800  | -1.83700500 | -0.24304100 |
| C | 7.55646300  | -3.06481100 | -0.24035000 |
| H | 8.12451800  | -3.99034400 | -0.21629700 |
| C | 6.16927500  | -3.11822500 | -0.26266300 |
| H | 5.65165000  | -4.07211800 | -0.25633100 |
| C | 5.45610600  | -1.92525500 | -0.29219800 |
| C | 3.91356300  | 0.03610800  | -0.33453600 |
| C | 2.86175300  | 0.94744800  | -0.31602700 |
| H | 3.12844100  | 2.00003600  | -0.27901000 |
| C | 1.49369800  | 0.69578200  | -0.32327400 |
| C | 0.34912600  | 1.62230700  | -0.29101200 |
| C | 0.53449100  | -0.42905800 | -0.39000900 |
| C | -0.60792000 | 0.50192300  | -0.35246100 |
| C | 5.71561300  | 1.76730400  | -0.38552800 |
| H | 5.01841500  | 2.34437300  | -0.99696200 |

|   |              |             |             |
|---|--------------|-------------|-------------|
| H | 6.66903100   | 1.77924900  | -0.91824300 |
| C | 5.86727800   | 2.38393000  | 1.00474400  |
| H | 6.56593600   | 1.77673000  | 1.59331300  |
| H | 4.90243900   | 2.34898600  | 1.52494000  |
| C | 6.36661100   | 3.82603900  | 0.93497200  |
| H | 7.32676700   | 3.85254400  | 0.40349500  |
| H | 5.66563000   | 4.42473900  | 0.33919600  |
| C | 6.53013300   | 4.45558700  | 2.31655600  |
| H | 6.88959400   | 5.48697200  | 2.24163400  |
| H | 7.24927800   | 3.89331700  | 2.92300300  |
| H | 5.57729000   | 4.47147100  | 2.85762400  |
| N | 5.25127800   | 0.38194300  | -0.35180100 |
| O | 0.63494000   | -1.65693900 | -0.45474400 |
| S | 3.72064100   | -1.70744200 | -0.31988100 |
| C | -1.99656900  | 0.37050200  | -0.36076400 |
| C | -2.62939000  | -0.90891300 | -0.41577700 |
| C | -2.85876900  | 1.50649100  | -0.30468600 |
| C | -3.99176500  | -1.04085300 | -0.42418000 |
| H | -2.00473800  | -1.79591900 | -0.44574600 |
| C | -4.22339100  | 1.37978100  | -0.31661800 |
| H | -2.41371000  | 2.49476600  | -0.24687800 |
| C | -4.85485300  | 0.09939300  | -0.39077900 |
| H | -4.40653000  | -2.03926800 | -0.45299800 |
| H | -4.82026200  | 2.27953400  | -0.25985300 |
| N | -6.20921200  | -0.02218200 | -0.43108800 |
| C | -7.03629000  | 1.19036900  | -0.31630000 |
| H | -6.87186200  | 1.64329100  | 0.67192400  |
| H | -6.68007400  | 1.90969300  | -1.06030700 |
| C | -8.53324400  | 1.00368300  | -0.53338000 |
| H | -8.72016700  | 0.56031100  | -1.51887200 |
| H | -8.95616200  | 0.32489700  | 0.21588800  |
| C | -6.84142900  | -1.33798200 | -0.34031000 |
| H | -7.83503600  | -1.26813600 | -0.78015000 |
| H | -6.29161100  | -2.03969700 | -0.97137900 |
| C | -6.94505000  | -1.86904300 | 1.09189200  |
| H | -5.94484700  | -1.91057800 | 1.54043900  |
| H | -7.52928300  | -1.16223100 | 1.69510100  |
| C | -7.59306300  | -3.25147400 | 1.14589900  |
| H | -8.58955900  | -3.20411500 | 0.68739000  |
| H | -7.00553600  | -3.95090100 | 0.53679700  |
| C | -7.71167600  | -3.79087300 | 2.56969500  |
| H | -8.32097700  | -3.12666900 | 3.19325400  |
| H | -8.17794200  | -4.78152300 | 2.58145800  |
| H | -6.72605300  | -3.87909900 | 3.04074200  |
| C | -9.26036200  | 2.34725800  | -0.44568700 |
| H | -8.85190700  | 3.03274100  | -1.19912400 |
| H | -9.06163800  | 2.80565800  | 0.53157800  |
| C | -10.76754900 | 2.20800200  | -0.64609900 |
| H | -11.20805100 | 1.55326000  | 0.11443600  |
| H | -11.26667600 | 3.18017000  | -0.57992100 |
| H | -10.99729500 | 1.78018200  | -1.62862800 |
| O | 0.24636200   | 2.85055100  | -0.23564900 |

|   |             |             |             |
|---|-------------|-------------|-------------|
| C | 9.74801400  | -1.81585000 | -0.20956300 |
| H | 10.13284900 | -0.79292200 | -0.20731100 |
| H | 10.12830400 | -2.32339800 | 0.68330400  |
| H | 10.16695900 | -2.33353100 | -1.07910200 |

### 6a S<sub>0</sub> CAMB3LYP/6-31+G(d) PCM Optimized Structure in DMSO

|     |             |             |             |
|-----|-------------|-------------|-------------|
| 0 1 |             |             |             |
| C   | 5.91266400  | -1.20921600 | -0.17816800 |
| C   | 7.30440300  | -1.26999600 | -0.08074900 |
| H   | 7.90619300  | -0.36908500 | -0.05021600 |
| C   | 7.92059900  | -2.51331400 | -0.01243500 |
| C   | 7.13194200  | -3.67947800 | -0.04250800 |
| H   | 7.62061100  | -4.64792400 | 0.01104700  |
| C   | 5.75190100  | -3.62491100 | -0.13456400 |
| H   | 5.15818700  | -4.53258800 | -0.15391400 |
| C   | 5.14703700  | -2.37114500 | -0.19925700 |
| C   | 3.79654500  | -0.29690100 | -0.32077700 |
| C   | 2.83169200  | 0.74974600  | -0.36286500 |
| H   | 3.21890400  | 1.75504700  | -0.27361200 |
| C   | 1.48211800  | 0.61350100  | -0.47610600 |
| C   | 0.37548400  | 1.57659700  | -0.50322000 |
| C   | 0.46207800  | -0.47090600 | -0.60258000 |
| C   | -0.59122600 | 0.53420300  | -0.52700300 |
| C   | 1.61142500  | 3.69399300  | -0.43413500 |
| C   | 0.39266500  | 2.97758200  | -0.53691400 |
| C   | -0.75500900 | 3.77500300  | -0.76060200 |
| C   | 5.71452700  | 1.28761400  | -0.26563600 |
| H   | 5.10798100  | 1.92709100  | -0.90726200 |
| H   | 6.68629300  | 1.20030100  | -0.75277400 |
| C   | 5.85403800  | 1.86803600  | 1.13929300  |
| H   | 6.45346600  | 1.18630800  | 1.75439400  |
| H   | 4.86495100  | 1.93087200  | 1.60857900  |
| C   | 6.50350400  | 3.25096200  | 1.11339400  |
| H   | 7.48823600  | 3.18121900  | 0.63393500  |
| H   | 5.90008300  | 3.92356500  | 0.49120300  |
| C   | 6.65607600  | 3.84679800  | 2.51092900  |
| H   | 7.12474300  | 4.83511700  | 2.46881100  |
| H   | 7.27868200  | 3.20721400  | 3.14669800  |
| H   | 5.68201500  | 3.95864800  | 3.00018500  |
| N   | 5.11840600  | -0.05883000 | -0.26348900 |
| N   | 2.60426400  | 4.29431100  | -0.34587700 |
| O   | 0.51352800  | -1.68824400 | -0.72755600 |
| S   | 3.44634500  | -1.99421800 | -0.30973300 |
| N   | -1.67159500 | 4.46330100  | -0.95883500 |
| C   | -2.01772500 | 0.37802900  | -0.47693600 |
| C   | -2.58441900 | -0.86337200 | -0.83467400 |
| C   | -2.90456800 | 1.37023500  | -0.02501900 |
| C   | -3.94418600 | -1.08667600 | -0.78487200 |
| H   | -1.93141500 | -1.66647300 | -1.15931600 |

|   |              |             |             |
|---|--------------|-------------|-------------|
| C | -4.26788900  | 1.15534100  | 0.03772400  |
| H | -2.52476300  | 2.32797400  | 0.30812900  |
| C | -4.84632600  | -0.07480000 | -0.36630800 |
| H | -4.30656200  | -2.06439000 | -1.07246200 |
| H | -4.88675900  | 1.95588200  | 0.41842800  |
| N | -6.20684700  | -0.26866200 | -0.35632600 |
| C | -7.05706800  | 0.78573400  | 0.20913900  |
| H | -6.84555800  | 0.90440200  | 1.28329200  |
| H | -6.78297600  | 1.72920000  | -0.27252800 |
| C | -8.55813400  | 0.59817100  | 0.01719300  |
| H | -8.78387100  | 0.44858700  | -1.04606400 |
| H | -8.91291000  | -0.29054300 | 0.55177600  |
| C | -6.75405800  | -1.61471100 | -0.50716800 |
| H | -7.79109100  | -1.52499200 | -0.83048100 |
| H | -6.24018100  | -2.11648800 | -1.33065700 |
| C | -6.68227200  | -2.46600500 | 0.76261100  |
| H | -5.63980300  | -2.53783300 | 1.09754500  |
| H | -7.23400200  | -1.95989500 | 1.56594500  |
| C | -7.25285800  | -3.86746300 | 0.55275300  |
| H | -8.29267800  | -3.78847700 | 0.20849500  |
| H | -6.69883600  | -4.36695100 | -0.25313600 |
| C | -7.19816800  | -4.72448700 | 1.81556200  |
| H | -7.77096300  | -4.26416500 | 2.62887100  |
| H | -7.61234700  | -5.72256400 | 1.63815900  |
| H | -6.16610300  | -4.84751900 | 2.16351500  |
| C | -9.32840100  | 1.81720600  | 0.52797500  |
| H | -9.00151100  | 2.71035100  | -0.01976400 |
| H | -9.07635300  | 1.99080400  | 1.58224500  |
| C | -10.84014200 | 1.65630000  | 0.38596700  |
| H | -11.19973800 | 0.79009100  | 0.95314400  |
| H | -11.36952200 | 2.54071700  | 0.75529700  |
| H | -11.12458600 | 1.50972300  | -0.66234000 |
| C | 9.41905800   | -2.62374300 | 0.09345800  |
| H | 9.89032600   | -1.63884000 | 0.13721200  |
| H | 9.70790300   | -3.17937400 | 0.99158300  |
| H | 9.83276500   | -3.15997600 | -0.76711900 |

### 6a S<sub>1</sub> CAMB3LYP/6-31+G(d) PCM Optimized Structure in DMSO

|   |            |             |             |
|---|------------|-------------|-------------|
| 0 | 1          |             |             |
| C | 5.92468400 | -1.24389600 | -0.23472500 |
| C | 7.31963400 | -1.33661300 | -0.17087500 |
| H | 7.93742700 | -0.44571800 | -0.16531200 |
| C | 7.91950400 | -2.59003700 | -0.10211000 |
| C | 7.11602100 | -3.74388200 | -0.09418600 |
| H | 7.58906500 | -4.72013300 | -0.03908500 |
| C | 5.73146200 | -3.66171600 | -0.15006300 |
| H | 5.12255100 | -4.56008100 | -0.13979700 |
| C | 5.14131300 | -2.40446800 | -0.21709500 |
| C | 3.80073800 | -0.30006100 | -0.32462300 |
| C | 2.86213900 | 0.72735700  | -0.32760200 |

|   |             |             |             |
|---|-------------|-------------|-------------|
| H | 3.26543500  | 1.73091700  | -0.28247900 |
| C | 1.47129000  | 0.62888100  | -0.35445600 |
| C | 0.39580500  | 1.60676100  | -0.33742900 |
| C | 0.44683800  | -0.43472500 | -0.47978300 |
| C | -0.63618400 | 0.58186800  | -0.41215800 |
| C | 1.68349900  | 3.68384900  | -0.23888600 |
| C | 0.44045500  | 2.99946300  | -0.31554000 |
| C | -0.68791300 | 3.85244100  | -0.41718500 |
| C | 5.77085900  | 1.23962600  | -0.37511700 |
| H | 5.14949400  | 1.87027500  | -1.01478700 |
| H | 6.72949200  | 1.13833400  | -0.88839500 |
| C | 5.96245600  | 1.87246300  | 1.00282500  |
| H | 6.58738700  | 1.21335300  | 1.61790600  |
| H | 4.99165300  | 1.94812600  | 1.50746800  |
| C | 6.60477300  | 3.25519100  | 0.90697500  |
| H | 7.57149600  | 3.17212400  | 0.39356700  |
| H | 5.97613400  | 3.90405100  | 0.28421700  |
| C | 6.80734800  | 3.90159400  | 2.27544500  |
| H | 7.26976900  | 4.88951600  | 2.18185300  |
| H | 7.45584700  | 3.28677800  | 2.90995200  |
| H | 5.85170300  | 4.02736900  | 2.79691800  |
| N | 5.16534200  | -0.09010400 | -0.31980900 |
| N | 2.69311100  | 4.25510200  | -0.17350800 |
| O | 0.47392700  | -1.65175700 | -0.59942000 |
| S | 3.43736400  | -2.01675300 | -0.29514100 |
| N | -1.57706200 | 4.59455900  | -0.50842500 |
| C | -2.02918200 | 0.42433000  | -0.37063600 |
| C | -2.57845700 | -0.88006200 | -0.58653600 |
| C | -2.97162700 | 1.45756200  | -0.09434900 |
| C | -3.92462300 | -1.11943100 | -0.56715200 |
| H | -1.89704100 | -1.70259200 | -0.77252600 |
| C | -4.32217400 | 1.22400700  | -0.07068900 |
| H | -2.62533500 | 2.45935100  | 0.11880100  |
| C | -4.86706500 | -0.07094400 | -0.32853900 |
| H | -4.26298800 | -2.13314800 | -0.73317400 |
| H | -4.97501600 | 2.05395300  | 0.16163800  |
| N | -6.20695600 | -0.28756300 | -0.34281500 |
| C | -7.11155700 | 0.82375200  | -0.00109200 |
| H | -6.92642600 | 1.12333700  | 1.03996200  |
| H | -6.84574500 | 1.67792200  | -0.63178500 |
| C | -8.60126100 | 0.55786400  | -0.18166500 |
| H | -8.81436400 | 0.28071600  | -1.22097400 |
| H | -8.93016900 | -0.27314200 | 0.45251600  |
| C | -6.74242900 | -1.64181800 | -0.48268400 |
| H | -7.75200700 | -1.56696500 | -0.88371400 |
| H | -6.16418300 | -2.17334800 | -1.24178400 |
| C | -6.76250900 | -2.43152200 | 0.82883900  |
| H | -5.74611100 | -2.49002900 | 1.23732400  |
| H | -7.36548700 | -1.88758700 | 1.56702300  |
| C | -7.32561100 | -3.83899800 | 0.63985200  |
| H | -8.34076400 | -3.77155500 | 0.22715900  |
| H | -6.72334700 | -4.37341200 | -0.10649600 |



|   |              |             |             |
|---|--------------|-------------|-------------|
| C | -7.35526100  | -4.63999900 | 1.93972500  |
| H | -7.97629700  | -4.14379100 | 2.69425500  |
| H | -7.76268100  | -5.64342700 | 1.77841800  |
| H | -6.34799500  | -4.75073800 | 2.35716300  |
| C | -9.41492400  | 1.80332700  | 0.17713100  |
| H | -9.09686000  | 2.64136500  | -0.45603700 |
| H | -9.19614500  | 2.09526500  | 1.21219000  |
| C | -10.91707000 | 1.58273200  | 0.01578400  |
| H | -11.26840700 | 0.77102800  | 0.66296100  |
| H | -11.47952300 | 2.48521200  | 0.27602700  |
| H | -11.16814100 | 1.31811400  | -1.01769000 |
| C | 9.41934100   | -2.71806600 | -0.03474100 |
| H | 9.90340200   | -1.73857000 | -0.00615600 |
| H | 9.72654600   | -3.27487600 | 0.85674100  |
| H | 9.80549200   | -3.26084500 | -0.90430900 |

### 6b S<sub>0</sub> CAMB3LYP/6-31+G(d) PCM Optimized Structure in DMSO

|     |             |             |             |
|-----|-------------|-------------|-------------|
| 0 1 |             |             |             |
| C   | 4.22479500  | 2.63245000  | -0.45243600 |
| H   | 5.13690500  | 2.75533000  | -1.04177600 |
| H   | 3.42007200  | 3.08183700  | -1.03864300 |
| C   | 4.36822100  | 3.32613800  | 0.90200400  |
| H   | 5.17034500  | 2.83995300  | 1.47126000  |
| H   | 3.44502100  | 3.19164400  | 1.47855900  |
| C   | 4.67036900  | 4.81550800  | 0.74825000  |
| H   | 3.86514800  | 5.28844700  | 0.17263700  |
| H   | 5.59001700  | 4.94009000  | 0.16169700  |
| C   | 4.82250000  | 5.52399100  | 2.09245600  |
| H   | 5.03919500  | 6.58862600  | 1.95708100  |
| H   | 5.63955400  | 5.08765400  | 2.67842500  |
| H   | 3.90509700  | 5.44218600  | 2.68641000  |
| C   | -5.97782500 | -1.66203500 | 0.40288900  |
| C   | -7.34632400 | -1.91453700 | 0.51176000  |
| H   | -8.06345900 | -1.10417500 | 0.57597200  |
| C   | -7.79270800 | -3.23181000 | 0.52650300  |
| C   | -6.85894200 | -4.27881300 | 0.43076200  |
| H   | -7.21285200 | -5.30559600 | 0.44271000  |
| C   | -5.49963100 | -4.03318300 | 0.31734700  |
| H   | -4.79117800 | -4.85132200 | 0.24122300  |
| C   | -5.06780700 | -2.71000900 | 0.30164900  |
| C   | -4.00254700 | -0.46169000 | 0.23585300  |
| C   | -3.20230900 | 0.69485000  | 0.14593600  |
| H   | -3.72975400 | 1.63875800  | 0.13879200  |
| C   | -1.83089800 | 0.76184500  | 0.04961500  |
| C   | -0.90991600 | 1.87101300  | -0.05717000 |
| C   | -0.67155800 | -0.15929500 | 0.01685700  |
| C   | 0.23231000  | 1.00534400  | -0.08614200 |
| C   | 1.59366700  | 1.35256400  | -0.17452700 |
| H   | 1.74580300  | 2.42334300  | -0.21581300 |

|    |             |             |             |
|----|-------------|-------------|-------------|
| C  | 2.75244500  | 0.60085100  | -0.21523900 |
| C  | 5.01209000  | 0.25926900  | -0.31324600 |
| C  | 6.38184800  | 0.47084200  | -0.38438500 |
| H  | 6.81407900  | 1.46228000  | -0.45455700 |
| C  | 7.21339800  | -0.64911300 | -0.35609300 |
| H  | 8.28859000  | -0.52044400 | -0.40889800 |
| C  | 6.66605700  | -1.92227600 | -0.25825100 |
| C  | 5.28875000  | -2.12786700 | -0.17904900 |
| H  | 4.88454000  | -3.13148300 | -0.10011000 |
| C  | 4.46893700  | -1.01645800 | -0.20505600 |
| C  | -2.39194100 | 3.83169100  | -0.05173700 |
| C  | -1.09839400 | 3.25868500  | -0.11013700 |
| C  | -0.02255700 | 4.17076600  | -0.23322400 |
| C  | -6.11260500 | 0.83588400  | 0.49013900  |
| H  | -5.50667800 | 1.56093800  | 1.03481800  |
| H  | -6.97619100 | 0.62466300  | 1.12265100  |
| C  | -6.55043000 | 1.38013400  | -0.86737900 |
| H  | -7.13814300 | 0.61583700  | -1.39006900 |
| H  | -5.66544700 | 1.57590500  | -1.48463500 |
| C  | -7.37469100 | 2.65857800  | -0.72279200 |
| H  | -8.25195800 | 2.45611700  | -0.09499300 |
| H  | -6.78118700 | 3.41512200  | -0.19439000 |
| C  | -7.82823400 | 3.21434900  | -2.07069600 |
| H  | -8.41702400 | 4.12828000  | -1.94281300 |
| H  | -8.44870900 | 2.48807800  | -2.60785200 |
| H  | -6.96909700 | 3.45556900  | -2.70663300 |
| N  | 3.97338900  | 1.20077300  | -0.33770500 |
| N  | -5.34646700 | -0.41297300 | 0.38074900  |
| N  | -3.45064100 | 4.31282600  | -0.00379500 |
| O  | -0.55815300 | -1.37757100 | 0.06239500  |
| S  | -3.43257200 | -2.10677500 | 0.15957300  |
| N  | 0.84743800  | 4.93683800  | -0.33717400 |
| C  | -9.26250800 | -3.54299500 | 0.64135800  |
| H  | -9.86104200 | -2.63027500 | 0.69493600  |
| H  | -9.60826200 | -4.12547900 | -0.21902100 |
| H  | -9.46823300 | -4.13631800 | 1.53853400  |
| C  | 2.96101100  | -0.91473600 | -0.13882200 |
| C  | 2.44892100  | -1.48790400 | 1.19504200  |
| H  | 1.36380200  | -1.41210800 | 1.25869900  |
| H  | 2.71950300  | -2.54643200 | 1.26179100  |
| H  | 2.90241300  | -0.96621100 | 2.04323700  |
| C  | 2.32774200  | -1.62771800 | -1.34821100 |
| H  | 2.58889400  | -2.69035300 | -1.31945700 |
| H  | 1.24134800  | -1.54561400 | -1.32140800 |
| H  | 2.70315100  | -1.20980200 | -2.28719700 |
| Br | 7.82453400  | -3.42754800 | -0.22288600 |

## 6b S<sub>1</sub> CAMB3LYP/6-31+G(d) PCM Optimized Structure in DMSO

|     |             |             |             |
|-----|-------------|-------------|-------------|
| 0 1 |             |             |             |
| C   | -4.24166000 | 2.62352400  | 0.45845400  |
| H   | -5.15073000 | 2.74989000  | 1.05129700  |
| H   | -3.43315300 | 3.07478500  | 1.03766500  |
| C   | -4.39163800 | 3.31043500  | -0.90015300 |
| H   | -5.19750700 | 2.82277300  | -1.46238500 |
| H   | -3.47143000 | 3.17222200  | -1.48034000 |
| C   | -4.69094500 | 4.80080400  | -0.74962900 |
| H   | -3.88170200 | 5.27490200  | -0.18077800 |
| H   | -5.60707100 | 4.92881400  | -0.15853100 |
| C   | -4.84982800 | 5.50315900  | -2.09629600 |
| H   | -5.06413200 | 6.56861200  | -1.96390800 |
| H   | -5.67106500 | 5.06556200  | -2.67532100 |
| H   | -3.93605400 | 5.41751100  | -2.69520900 |
| C   | 6.01853900  | -1.64536100 | -0.40431600 |
| C   | 7.38996000  | -1.91216600 | -0.49011900 |
| H   | 8.11289600  | -1.10562100 | -0.53708800 |
| C   | 7.83016300  | -3.23157100 | -0.50276200 |
| C   | 6.89237700  | -4.27668100 | -0.42603300 |
| H   | 7.24186000  | -5.30506600 | -0.43574600 |
| C   | 5.53129100  | -4.02193400 | -0.33331200 |
| H   | 4.81788000  | -4.83734700 | -0.27094700 |
| C   | 5.10123100  | -2.69960200 | -0.32031500 |
| C   | 4.03298000  | -0.44512500 | -0.26027700 |
| C   | 3.23078500  | 0.69118700  | -0.17169100 |
| H   | 3.75472400  | 1.63928900  | -0.17423700 |
| C   | 1.84412700  | 0.76911700  | -0.06723000 |
| C   | 0.91928500  | 1.87381000  | 0.04026100  |
| C   | 0.68348500  | -0.15566000 | -0.03699200 |
| C   | -0.25066400 | 1.00776700  | 0.07190600  |
| C   | -1.60006300 | 1.33901000  | 0.17464900  |
| H   | -1.76279600 | 2.40873700  | 0.23043300  |
| C   | -2.77147100 | 0.58116600  | 0.21585700  |
| C   | -5.02822700 | 0.26029900  | 0.32584100  |
| C   | -6.40190700 | 0.47521000  | 0.40904000  |
| H   | -6.83125500 | 1.46711400  | 0.48820300  |
| C   | -7.23398300 | -0.64063500 | 0.38014000  |
| H   | -8.30852100 | -0.51014300 | 0.44170400  |
| C   | -6.69124000 | -1.91755100 | 0.27042800  |
| C   | -5.31474800 | -2.12826000 | 0.17965700  |
| H   | -4.91569900 | -3.13321700 | 0.09230200  |
| C   | -4.48965400 | -1.02182800 | 0.20589200  |
| C   | 2.38734100  | 3.83515600  | 0.04294000  |
| C   | 1.09426700  | 3.25226300  | 0.09637300  |
| C   | 0.00549800  | 4.15466300  | 0.21529800  |
| C   | 6.16754200  | 0.84063700  | -0.48026400 |
| H   | 5.57050700  | 1.56806500  | -1.03418000 |
| H   | 7.04733000  | 0.63990400  | -1.09526200 |
| C   | 6.57824300  | 1.38949700  | 0.88552300  |

|    |             |             |             |
|----|-------------|-------------|-------------|
| H  | 7.16763100  | 0.63093700  | 1.41503600  |
| H  | 5.68125800  | 1.57148600  | 1.48968800  |
| C  | 7.38777600  | 2.67900200  | 0.75890100  |
| H  | 8.27710000  | 2.49066000  | 0.14362300  |
| H  | 6.79263200  | 3.42981300  | 0.22386700  |
| C  | 7.81370400  | 3.23644300  | 2.11521300  |
| H  | 8.39130600  | 4.15925800  | 1.99994300  |
| H  | 8.43630800  | 2.51693300  | 2.65905100  |
| H  | 6.94182000  | 3.46271200  | 2.73930700  |
| N  | -3.99366100 | 1.19064200  | 0.34698700  |
| N  | 5.40538400  | -0.40474400 | -0.39172200 |
| N  | 3.44655800  | 4.31089300  | -0.00111900 |
| O  | 0.56849500  | -1.37066500 | -0.08412300 |
| S  | 3.46199900  | -2.10195800 | -0.20620400 |
| N  | -0.88004300 | 4.90057600  | 0.31405800  |
| C  | 9.30075600  | -3.54704000 | -0.59411500 |
| H  | 9.90327600  | -2.63606400 | -0.63237000 |
| H  | 9.63024400  | -4.13582800 | 0.26852100  |
| H  | 9.52025000  | -4.13625800 | -1.49091600 |
| C  | -2.98255900 | -0.92709400 | 0.13155200  |
| C  | -2.47426100 | -1.49996800 | -1.20637300 |
| H  | -1.39026500 | -1.41264800 | -1.27758200 |
| H  | -2.73355300 | -2.56174600 | -1.26854600 |
| H  | -2.93796700 | -0.98434400 | -2.05242800 |
| C  | -2.34155400 | -1.65476300 | 1.33096400  |
| H  | -2.59329800 | -2.71931900 | 1.28646100  |
| H  | -1.25580100 | -1.56255600 | 1.30375600  |
| H  | -2.71819500 | -1.25320200 | 2.27628200  |
| Br | -7.85554600 | -3.41540000 | 0.23484000  |

### 6c S<sub>0</sub> CAMB3LYP/6-31+G(d) PCM Optimized Structure in DMSO

|     |             |             |             |
|-----|-------------|-------------|-------------|
| 0 1 |             |             |             |
| C   | -5.90179600 | 0.92831600  | -0.38030000 |
| H   | -5.33931800 | 1.57908900  | -1.05177500 |
| H   | -6.82238200 | 0.67227600  | -0.90470800 |
| C   | -6.18653700 | 1.61780700  | 0.95380500  |
| H   | -5.23593400 | 1.79832800  | 1.46799300  |
| H   | -6.76673700 | 0.93982200  | 1.59187400  |
| C   | -6.93618700 | 2.94291400  | 0.78960200  |
| H   | -6.34865000 | 3.61516400  | 0.15140100  |
| H   | -6.98885800 | 3.42394800  | 1.77283900  |
| C   | -8.35050800 | 2.79970600  | 0.22679500  |
| H   | -8.86193100 | 3.76752800  | 0.21458500  |
| H   | -8.94877400 | 2.11365500  | 0.83764300  |
| H   | -8.35066800 | 2.42003800  | -0.80029400 |
| C   | 5.08432600  | -0.43608900 | -0.23446200 |
| C   | 6.45591000  | -0.38753700 | -0.24302200 |
| H   | 6.99476400  | 0.54395600  | -0.37430600 |
| C   | 7.19179300  | -1.58634600 | -0.06517900 |

|   |             |             |             |
|---|-------------|-------------|-------------|
| C | 6.50654600  | -2.82333600 | 0.12284300  |
| C | 5.08843600  | -2.83830500 | 0.13318400  |
| H | 4.56232900  | -3.77671100 | 0.27966600  |
| C | 4.40760400  | -1.66527100 | -0.03925900 |
| C | 2.87468300  | 0.30087500  | -0.30989400 |
| C | 1.84902500  | 1.23422500  | -0.38479300 |
| H | 2.14559800  | 2.27176400  | -0.46089800 |
| C | 0.47343000  | 0.99701800  | -0.34549000 |
| C | -0.65231100 | 1.88273900  | -0.37104000 |
| C | -0.44870300 | -0.15235600 | -0.29635500 |
| C | -1.59348400 | 0.79058200  | -0.30227500 |
| C | -2.97354100 | 0.75228100  | -0.27858100 |
| H | -3.47874100 | 1.70774400  | -0.31990900 |
| C | -3.79534600 | -0.38311800 | -0.18379600 |
| C | -5.79416100 | -1.55218800 | -0.05493400 |
| C | -7.16972500 | -1.78516100 | -0.01705700 |
| H | -7.87947400 | -0.96993800 | -0.09986200 |
| C | -7.63311200 | -3.08769200 | 0.14089400  |
| C | -6.70880900 | -4.13982900 | 0.26041200  |
| H | -7.07522800 | -5.15482700 | 0.38373700  |
| C | -5.34130600 | -3.91296900 | 0.22896900  |
| H | -4.63901100 | -4.73421300 | 0.32615700  |
| C | -4.89262100 | -2.60524000 | 0.07267900  |
| C | 0.32491000  | 4.13763100  | -0.49913500 |
| C | -0.79594000 | 3.27574300  | -0.44160600 |
| C | -2.06924800 | 3.89264700  | -0.46207000 |
| C | 4.67199100  | 1.99118800  | -0.64921800 |
| H | 3.95557900  | 2.49112500  | -1.30332900 |
| H | 5.59868900  | 1.90776500  | -1.22101400 |
| C | 4.89676800  | 2.78358000  | 0.63678600  |
| H | 5.60492700  | 2.24143400  | 1.27518100  |
| H | 3.95450600  | 2.84766100  | 1.19427200  |
| C | 5.42640900  | 4.18856800  | 0.35370500  |
| H | 6.36553000  | 4.11630200  | -0.20995700 |
| H | 4.71644500  | 4.72105700  | -0.29175400 |
| C | 5.65830600  | 4.99266400  | 1.63082100  |
| H | 6.03624100  | 5.99479700  | 1.40422000  |
| H | 6.38896700  | 4.49792000  | 2.28081000  |
| H | 4.72818700  | 5.10600500  | 2.19916500  |
| N | -5.14830300 | -0.32109400 | -0.21491500 |
| N | 4.19393600  | 0.62813900  | -0.40513700 |
| N | 1.24234100  | 4.85246000  | -0.54680200 |
| O | -0.32943900 | -1.37066300 | -0.28054200 |
| S | 2.66811400  | -1.42567400 | -0.05587400 |
| S | -3.24244500 | -2.02709900 | 0.00807800  |
| N | -3.11292100 | 4.40786300  | -0.48064000 |
| C | -9.11153400 | -3.37551900 | 0.18639400  |
| H | -9.38674200 | -3.86730800 | 1.12525900  |
| H | -9.69969400 | -2.45860800 | 0.09934200  |
| H | -9.40555600 | -4.04510100 | -0.62881400 |
| C | 7.26400400  | -4.01221000 | 0.29973200  |
| H | 6.73576500  | -4.95093200 | 0.44252000  |

|   |             |             |             |
|---|-------------|-------------|-------------|
| C | 8.63434800  | -3.97899700 | 0.29113400  |
| H | 9.20260900  | -4.89402500 | 0.42702300  |
| C | 9.31621600  | -2.75082800 | 0.10554300  |
| H | 10.40186600 | -2.73555100 | 0.10087100  |
| C | 8.61345100  | -1.58675100 | -0.06755300 |
| H | 9.13542200  | -0.64450600 | -0.21011300 |

**6c S<sub>1</sub> CAMB3LYP/6-31+G(d) PCM Optimized Structure in DMSO**

|     |             |             |             |
|-----|-------------|-------------|-------------|
| 0 1 |             |             |             |
| C   | -5.94607700 | 0.92001500  | -0.37925700 |
| H   | -5.39261900 | 1.57170400  | -1.05902300 |
| H   | -6.87447300 | 0.66573200  | -0.89192300 |
| C   | -6.21738700 | 1.61888200  | 0.95429600  |
| H   | -5.26162600 | 1.79449000  | 1.46073800  |
| H   | -6.79737500 | 0.94704100  | 1.59924700  |
| C   | -6.95915600 | 2.94846700  | 0.79123000  |
| H   | -6.37228400 | 3.61415000  | 0.14532100  |
| H   | -7.00117100 | 3.43458300  | 1.77264700  |
| C   | -8.37875400 | 2.81264500  | 0.23983500  |
| H   | -8.88368500 | 3.78391100  | 0.22576900  |
| H   | -8.97716700 | 2.13425000  | 0.85908500  |
| H   | -8.38898500 | 2.42668000  | -0.78483400 |
| C   | 5.10188800  | -0.42424800 | -0.23726000 |
| C   | 6.48008800  | -0.38907900 | -0.23993700 |
| H   | 7.02617100  | 0.53959500  | -0.36019500 |
| C   | 7.20413700  | -1.59274100 | -0.07037200 |
| C   | 6.50966800  | -2.82928300 | 0.10611700  |
| C   | 5.09204000  | -2.83488500 | 0.11353200  |
| H   | 4.55950900  | -3.77098300 | 0.25153700  |
| C   | 4.41654600  | -1.65652600 | -0.05203000 |
| C   | 2.89563900  | 0.31039800  | -0.31344100 |
| C   | 1.86141200  | 1.24552900  | -0.38595300 |
| H   | 2.16554700  | 2.28181200  | -0.47239900 |
| C   | 0.49220700  | 1.01975800  | -0.34335500 |
| C   | -0.65971000 | 1.90066800  | -0.38879400 |
| C   | -0.44951000 | -0.13029700 | -0.26508300 |
| C   | -1.60438900 | 0.80573500  | -0.30696000 |
| C   | -2.99445100 | 0.75079900  | -0.29475200 |
| H   | -3.50335200 | 1.70511000  | -0.35927000 |
| C   | -3.81459700 | -0.37314900 | -0.19546300 |
| C   | -5.81342000 | -1.54869000 | -0.05341900 |
| C   | -7.18929800 | -1.80076700 | -0.00334400 |
| H   | -7.90765600 | -0.99243100 | -0.07992500 |
| C   | -7.63922100 | -3.10688200 | 0.15922900  |
| C   | -6.70639800 | -4.15293000 | 0.27438200  |
| H   | -7.06346200 | -5.17080700 | 0.40172300  |
| C   | -5.34038400 | -3.91189100 | 0.23370500  |
| H   | -4.63026000 | -4.72704400 | 0.32805600  |
| C   | -4.90056400 | -2.60272300 | 0.07140600  |

|   |             |             |             |
|---|-------------|-------------|-------------|
| C | 0.32658900  | 4.13951800  | -0.54710900 |
| C | -0.80053500 | 3.28015500  | -0.48004500 |
| C | -2.07765200 | 3.89767300  | -0.51096600 |
| C | 4.70995100  | 2.00169800  | -0.62318400 |
| H | 3.99982300  | 2.51335900  | -1.27552700 |
| H | 5.64157700  | 1.92629400  | -1.18846100 |
| C | 4.92546800  | 2.77663000  | 0.67597800  |
| H | 5.62854500  | 2.22528400  | 1.31198600  |
| H | 3.97866100  | 2.83324700  | 1.22662300  |
| C | 5.45752800  | 4.18513500  | 0.41601300  |
| H | 6.40122700  | 4.12033100  | -0.14082600 |
| H | 4.75294100  | 4.72653000  | -0.22797500 |
| C | 5.67906800  | 4.97178400  | 1.70580600  |
| H | 6.05908400  | 5.97672600  | 1.49570700  |
| H | 6.40430800  | 4.46812000  | 2.35498200  |
| H | 4.74437800  | 5.07783300  | 2.26802000  |
| N | -5.19082800 | -0.32340400 | -0.22091200 |
| N | 4.22813100  | 0.63759900  | -0.40210800 |
| N | 1.25248700  | 4.83943900  | -0.60154500 |
| O | -0.32277400 | -1.34411400 | -0.20036500 |
| S | 2.68204400  | -1.41232300 | -0.07595100 |
| S | -3.25334900 | -2.02201900 | -0.00843400 |
| N | -3.12494600 | 4.40032300  | -0.53665800 |
| C | -9.11482400 | -3.40655600 | 0.21579600  |
| H | -9.37940200 | -3.89960800 | 1.15718100  |
| H | -9.71126100 | -2.49467800 | 0.13163300  |
| H | -9.40923600 | -4.07999100 | -0.59624400 |
| C | 7.25842000  | -4.02412500 | 0.27458900  |
| H | 6.72298600  | -4.96016900 | 0.40818300  |
| C | 8.62945800  | -4.00126300 | 0.26967100  |
| H | 9.19080400  | -4.92144400 | 0.39925200  |
| C | 9.32024200  | -2.77594900 | 0.09607600  |
| H | 10.40603700 | -2.76839800 | 0.09410100  |
| C | 8.62683500  | -1.60527100 | -0.06882800 |
| H | 9.15642900  | -0.66594800 | -0.20223700 |
